# Supplementary material
Source: PubMed Central journal article supplement (PMC3838739)
Supplement: mmc9.pdf [file mmc9.pdf]

# Cells Actively Stiffen Fibrin Networks by Generating Contractile Stress

Karin A. Jansen, Rommel G. Bacabac, Izabela K. Piechocka, and Gijssje H. Koenderink\*

Biological Soft Matter Group, FOM Institute AMOLF, Amsterdam, Netherlands

**ABSTRACT** During wound healing and angiogenesis, fibrin serves as a provisional extracellular matrix. We use a model system of fibroblasts embedded in fibrin gels to study how cell-mediated contraction may influence the macroscopic mechanical properties of their extracellular matrix during such processes. We demonstrate by macroscopic shear rheology that the cells increase the elastic modulus of the fibrin gels. Microscopy observations show that this stiffening sets in when the cells spread and apply traction forces on the fibrin fibers. We further show that the stiffening response mimics the effect of an external stress applied by mechanical shear. We propose that stiffening is a consequence of active myosin-driven cell contraction, which provokes a nonlinear elastic response of the fibrin matrix. Cell-induced stiffening is limited to a factor 3 even though fibrin gels can in principle stiffen much more before breaking. We discuss this observation in light of recent models of fibrin gel elasticity, and conclude that the fibroblasts pull out floppy modes, such as thermal bending undulations, from the fibrin network, but do not axially stretch the fibers. Our findings are relevant for understanding the role of matrix contraction by cells during wound healing and cancer development, and may provide design parameters for materials to guide morphogenesis in tissue engineering.

## INTRODUCTION

The mechanical behavior of animal cells is controlled by a network of stiff protein filaments known as the cytoskeleton. The cytoskeleton is a remarkable material that is maintained out of equilibrium by a variety of molecular processes using chemical energy (1). An important contribution comes from molecular motors, which use energy resulting from ATP hydrolysis to move along actin filaments and microtubules (2). There is strong evidence that myosin II motors, which interact with actin filaments, actively increase cell stiffness by generating contractile prestress (3–7). Measurements on purified actin networks have shown that these networks strongly stiffen when either an external or an internal stress is applied (8,9). Cells can exploit this nonlinear stress response to modify their stiffness rapidly in response to changes in the stiffness of the extracellular environment (10,11). Conversely, the stiffness of the extracellular environment can change in response to activity of the cells, because the contractile actin-myosin cytoskeleton is physically connected to the extracellular matrix (ECM) via integrin transmembrane receptors organized in adhesion complexes (12–14). Cells thus partly transmit their internally generated forces to the ECM. These so-called traction forces are typically in the nanoNewton range (15–19). By pulling on the matrix, cells can actively sense changes in ECM rigidity, on which they

base decisions regarding spreading, migration, proliferation, gene expression, and even differentiation (20–24). This mechanoresponsiveness plays a crucial role in normal tissue development and function (25,26). Misregulation of the balance between cell traction and ECM stiffness contributes to cancer progression, fibrotic disease, and atherosclerosis (27–29).

In connective tissues, cells reside within an ECM that is mainly composed of collagen fibers (30). Active cell contraction results in patterning and contraction of the collagen network during tissue morphogenesis and wound healing (31–34). During wound healing, cells are initially recruited to a provisional ECM composed of the blood clotting protein fibrin (35), which is likewise contracted and patterned by active cell contraction (36,37). Similar to actin networks, fibrin and collagen networks stiffen in response to an applied stress (38–41). Therefore, we anticipate—in analogy to the actin cytoskeleton, which is stiffened by myosin contractility—that extracellular networks can be driven into a nonlinear, stress-stiffened regime by cellular contraction. There are indeed several reports of cell-induced stiffening of ECM gels that suggest an active, myosin-dependent origin. A classic example of cell-mediated ECM stiffening is provided by the phenomenon of clot retraction in the initial stage of blood clotting. Here, platelets actively contract and stiffen the fibrin blood clot (42–44). More recently, fibroblasts and mesenchymal stem cells were also shown to cause fibrin gel stiffening, and it was hypothesized that active cell contraction drives the gel into a nonlinear, stress-stiffened regime (45). Similarly, active stiffening by cellular contraction has been reported for collagen networks (46–48). However, the precise physical mechanisms of cellular control over the mechanical properties of the ECM remain unclear, because quantitative

Submitted March 15, 2013, and accepted for publication October 7, 2013.

\*Correspondence: [g.koenderink@amolf.nl](mailto:g.koenderink@amolf.nl)

Rommel Bacabac's present address is Department of Physics, University of San Carlos, Cebu City, Philippines.

Izabela Piechocka's present address is ICFO-Institut de Ciències Fotòniques, Mediterranean Technology Park, 08860 Castelldefels (Barcelona), Spain.

Editor: Wirtz Denis.

© 2013 by the Biophysical Society  
0006-3495/13/11/2240/12 \$2.00

<http://dx.doi.org/10.1016/j.bpj.2013.10.008>

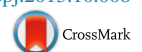

measurements comparing the linear and nonlinear rheology of ECM networks in the presence and absence of cells are lacking.

Here, we use a model system of fibroblasts embedded in fibrin gels to study how the contractile activity of cells affects the macroscopic mechanical properties of their environment. We measure the linear and nonlinear rheological properties of the cell-populated fibrin networks and correlate these with the dynamics of cell spreading and fibrin gel contraction. We demonstrate that the cells stiffen the fibrin gels while they spread, by applying myosin-II-driven traction forces that drive the gels into a stiff nonlinear elastic regime. Because fibrin serves as a provisional matrix in wound healing and angiogenesis, and is also involved in pathological states such as tumor invasion, our results are relevant for interpreting the mechanical role of cells in fibrin remodeling during wound repair, angiogenesis, and tumor growth (37,49,50). Moreover, the system studied here is relevant in the contexts of tissue regeneration (37,51,52), and surgery and tissue repair (53).

## MATERIALS AND METHODS

### Cell culture

Human CCL-224 fibroblasts (a gift from Prof. J. Boonstra, Biology Department, Utrecht Universiteit, NL) were cultured to near confluency in 75-cm<sup>2</sup> tissue culture flasks (Nunc, Roskilde, Denmark) in  $\alpha$ -Modified Eagle's Medium ( $\alpha$ -MEM, Gibco, Paisely, UK) supplemented with 10% fetal bovine serum (FBS, Gibco), antibiotics (10  $\mu$ g/ml penicillin/streptomycin, Sigma-Aldrich, Zwijndrecht, Netherlands), and 20 mM HEPES (Sigma-Aldrich). Cultures were incubated at 37°C and 5% CO<sub>2</sub> in a humidified incubator and subcultured at confluency.

### Fibrin gel preparation and cell seeding

Cell pellets were resuspended in a CO<sub>2</sub>-independent medium composed of  $\alpha$ -MEM medium supplemented with 20 mM Hepes, 2% FBS, and 0.1% pen/strep. This stock suspension was used within 1 h. The cell density was determined using a microscope counting chamber (Hemacytometer, Optik Labor, Lancing, UK). To prepare fibrin gels, fibrinogen was first polymerized in fibrin assembly (FA) buffer (20 mM Hepes, 150 mM NaCl, 5 mM CaCl<sub>2</sub>, pH 7.4) and then overlaid with CO<sub>2</sub>-independent medium. For cell-seeded gels, cells were centrifuged for a few minutes, resuspended in FA buffer, and directly mixed with human fibrinogen (Enzyme Research Laboratories, Swansea, UK) to attain a final density of 500 cells/ $\mu$ l unless stated otherwise. Polymerization and cross-linking of fibrinogen was initiated by adding 0.5 units/mL human  $\alpha$ -thrombin (Enzyme Research Laboratories) final concentration. Fibrin's  $\gamma$ - and  $\alpha$ -chains were fully cross-linked by FXIIIa present in the stock, according to SDS-PAGE analysis (39). Fibrin gels were prepared at concentrations ranging from 0.1 to 6 mg/ml, where 1 mg/ml is equivalent to a molar concentration of 2.94  $\mu$ M. Fibrin fibers form in a two-stage process, where fibrin monomers first form double-stranded protofibrils (with a mass/length ratio of 1.5  $\cdot$  10<sup>11</sup> Da/cm), which then laterally associate into fibers. The fibers prepared under our conditions have a constant diameter close to 100 nm and a mass/length ratio of  $\sim$ 1  $\times$  10<sup>13</sup> Da/cm (corresponding to 86 protofibrils per fiber), as determined by wavelength-dependent turbidity measurements (39).

## Rheology

Rheology tests were performed with a stress-controlled rheometer (Physica MCR 501; Anton Paar, Graz, Austria). Fibrinogen solutions with or without cells were polymerized at 37°C between the steel cone and plate (40-mm diameter, 1°). After 10 min, the fibrin gel was overlaid with 8 mL of  $\alpha$ -MEM supplemented with 2% FBS, 20 mM Hepes, and 0.1% antibiotics, (Fig. 1 A). We verified that the rheology measurements are minimally affected by the oxygen/metabolite gradient between the edge and center of the cone-plate geometry, by quantifying cell viability by microscopy (materials and methods section and Fig. S1 in the Supporting Material). The time evolution of the linear shear modulus,  $G^*$ , during fibrin polymerization and cell spreading was monitored by applying a small-amplitude oscillatory strain with amplitude  $\gamma = 0.5\%$  and frequency  $\omega = 3.14$  rad/s and measuring the stress response,  $\sigma(\omega) = G^*\gamma(\omega)$ . The shear modulus is a complex quantity,  $G^* = G' + iG''$ , having an in-phase elastic component,  $G'$ , and an out-of-phase viscous component,  $G''$ . The gels were axially constrained by strong adherence to the rheometer plates throughout the experiment. Networks reached a constant shear modulus after 3 h in the absence of cells and 4 h in the presence of cells. The frequency-dependent rheology of fully polymerized networks was probed across a frequency range of 0.06–38 rad/s using an oscillatory strain of 0.5% amplitude. The high-strain regime was probed by applying a steady prestress,  $\sigma_0$ , and superposing a small stress oscillation of amplitude  $\delta\sigma = 0.1\sigma_0$ . The tangent modulus

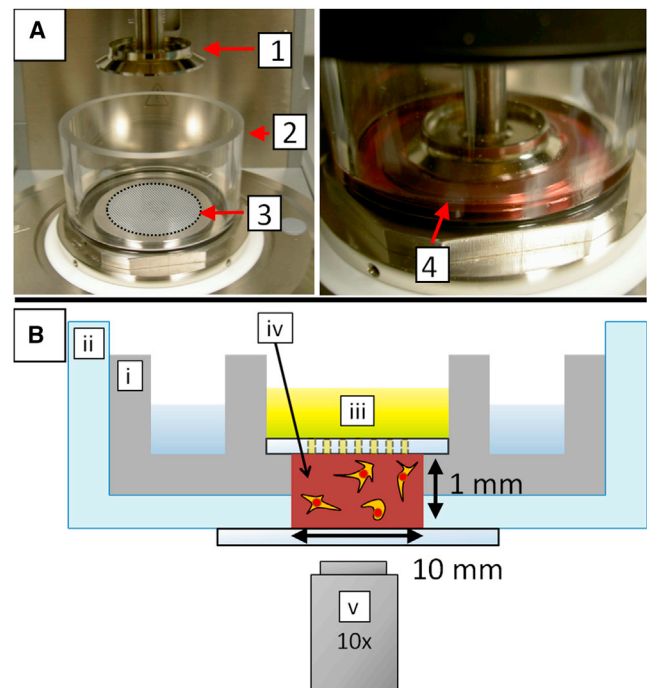

FIGURE 1 Experimental assays. (A) The viscoelastic properties of cell-populated fibrin gels were measured with a stress-controlled rheometer (left). The top plate is a cone (1) of 40 mm in diameter and 1° angle. The fibrin solution was pipetted on the bottom plate (3), the top plate was quickly lowered (right), and the fibrin was allowed to polymerize in situ at 37°C. The gel was immersed in cell culture medium supplemented with serum (4), using a Perspex ring (2). (B) Schematic representation of the custom-designed microscope holder used for observing cells spreading in fibrin gels (not drawn to scale). The sample (iv) was confined in a stainless steel well (i) topped with a glass plate with holes to enable medium (iii) exchange. The entire geometry was contained in a glass bottom dish (ii). Cell spreading was observed by bright field microscopy using a 10 $\times$  air microscope objective (v). To see this figure in color, go online.

follows from the oscillatory strain response,  $K^*(\sigma_0) = \delta\sigma/\delta\gamma$ .  $K'$  was independent of frequency and of waiting time in the prestressed state, indicating negligible viscous flow (54). Unless noted otherwise, rheology data are expressed as mean  $\pm$  standard deviation from at least three independent experiments. Statistical analysis was performed using the Student's  $t$ -test;  $p < 0.1$  was considered significant.

## Microscopy

To visualize cell spreading inside fibrin gels, we observed cell-populated fibrin gels on a Nikon inverted microscope, using an incubation chamber and objective heater to maintain a temperature of 37°C (TokaiHit, Shizuoka-ken, Japan). The cell-seeded gels were prepared in a custom-made holder, consisting of a stainless steel well for maintaining a humid atmosphere and a glass disc with 500  $\mu\text{m}$ -diameter holes to permit medium exchange, as sketched in Fig. 1 B. Bright field images of spreading cells were taken with a 10 $\times$  air objective using an EM-CCD camera (Roper Coolsnap, Photometrics, Tucson, AZ) at a rate of 1 frame/min and exposure time of 200 ms. Cell viability was maintained by blocking infrared and ultraviolet (UV) light with a bandpass filter and by controlling light exposure with a light shutter synchronized with image frame grabbing.

Traction strains applied by spreading cells were visualized by time-lapse imaging of 1  $\mu\text{m}$  diameter polystyrene beads adhered to the fibrin network in bright field at a rate of 1 frame/min. The particle displacements were tracked at 15 nm resolution using a tracking program written in Labview 7.1 (National Instruments Corporation, Utrecht, NL) that identifies particles by a pattern matching routine (55).

Fluorescent fibrin gels for confocal microscopy were prepared by mixing unlabeled fibrinogen with 24 mol % of Alexa488-labeled fibrinogen (Invitrogen, Breda, NL). The networks were imaged using a scanning confocal microscope on an inverted Eclipse Ti microscope (Nikon, Nikon Instruments Europe, Amstelveen, Netherlands). Fluorescence images were obtained by illumination with a 488 Ar laser (Melles Griot, Albuquerque, NM) and differential interference contrast images were recorded at the same time. Images were taken at least 50  $\mu\text{m}$  from the surface. Z-stacks were taken with a piezo-driven immersion objective (either 100 $\times$  oil or 40 $\times$  oil objective, Nikon). During a time-sequence, an image was taken every 10 min at 5 to 10 regions in the sample. Image stacks were projected along the  $z$  axis (for  $z$ -stacks) or time axis (for time-lapse movies) in ImageJ (<http://rsbweb.nih.gov/ij/>).

## RESULTS

### Cell spreading and traction force generation

We constructed a biomimetic tissue model by dispersing fibroblasts inside a cross-linked fibrin network. The cells were suspended in a solution of initially monomeric fibrinogen and were entrapped in the network during thrombin-triggered fibrin polymerization. To ensure that we look only at effects of cell traction forces, we focus on a time window of 7 h after cell seeding. This time is sufficiently long for cells to spread and apply traction forces to the gels, but not long enough for matrix remodeling by chemical effects such as proteolytic degradation, matrix synthesis, or matrix cross-linking, which require timescales of over 24 h (51,56–59).

To monitor the time dependence of matrix formation, we observed the networks with confocal fluorescence microscopy. Matrix formation started immediately upon thrombin addition and warming to 37°C, resulting in a space-filling

network of fibrin fibers within several minutes (see Fig. S2). To monitor the dynamics of cell spreading, we observed the cells with bright field microscopy (Fig. 2). The entrapped cells initially remained round, indicative of negligible attachment to the matrix (first column, 0 h). However, within 2 h, the cell shapes started to change as the cells attached to the matrix and spread.

Though there was some variation in the time needed for different cells within the same gel to spread, all cells in a given gel were fully spread within 4–6 h. The shape change of the cells was most pronounced in dilute (0.5–2 mg/ml) fibrin gels. The cell body became elongated and extended several thin pseudopodial processes into the surrounding matrix with lengths up to 50  $\mu\text{m}$ ; in the focal plane we typically observed between 2 and 6 such protrusions. This multipolar morphology is characteristic of cells residing inside fibrin or collagen gels and resembles cell morphologies inside tissues, although being strikingly different from the flat, fan-like morphology of the same cells plated on flat substrates (60–63). Time lapse imaging revealed that the pseudopodial processes underwent cycles of extension and retraction (see Movie S1). The lifetime of pseudopodia was usually 1–3 h. Nearly all protrusions had multiple side branches; some of these were highly dynamic and grew and retracted on timescales of minutes, whereas others were stable for hours (for examples see *white arrows* in Fig. 2). Fibroblasts in denser (3–6 mg/ml) fibrin gels had a markedly different morphology, exhibiting only short and thin protrusions (Fig. 2 and Movie S2). The overall cell diameter remained close to the original diameter, which

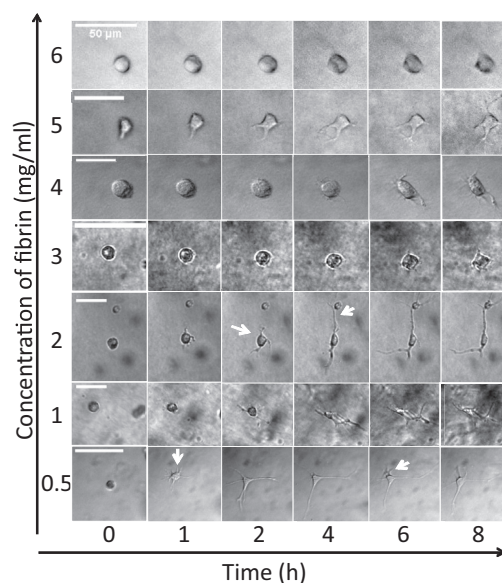

FIGURE 2 Morphological changes of cells during spreading in fibrin gels of different densities. Representative bright field images of fibroblasts at several stages during cell spreading (*time axis on bottom*) in fibrin gels of concentrations ranging from 0.5 to 6 mg/ml (*concentration axis on the left*). Scale bars, 50  $\mu\text{m}$ . Arrows point to examples of pseudopodia.



was typically  $<25 \mu\text{m}$ . This was more noticeable when zooming in with a  $40\times$  objective (see Fig. S3).

To test whether cell spreading resulted in matrix remodeling, we performed three-dimensional (3D) imaging of fluorescently labeled fibrin networks using confocal microscopy. In the absence of cells, fibrin networks were homogeneous and isotropic over the entire range of fibrin concentrations. As an example, Fig. 3 A shows the maximum intensity projection of a confocal  $z$ -stack for a 1 mg/ml fibrin network. When cells are present during fibrin polymerization, the networks are locally restructured around the cells. Fig. 3 B shows an example maximum intensity projection taken after overnight incubation of a cell (near the center of the image) inside a 1 mg/ml fibrin network (Movie S3 shows the entire  $z$ -stack with the fibrin image merged with the bright field image of the cell). There

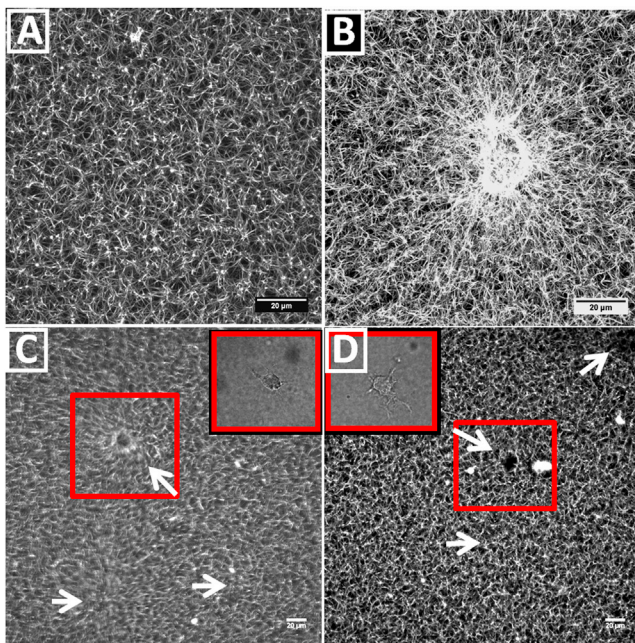

FIGURE 3 Spreading cells locally remodel the surrounding fibrin network by recruiting and aligning fibrin fibers. (A) Maximum intensity projection of a confocal  $z$ -stack of  $40 \mu\text{m}$  of a fluorescently labeled 1 mg/ml fibrin network without cells. (B) Maximum intensity projection of a  $40 \mu\text{m}$  confocal  $z$ -stack of a cell-populated 1 mg/ml fibrin network, showing alignment and recruitment of fibrin fibers around the cell located near the center of the image. Movie S3 shows the corresponding  $z$ -stack, combining fluorescence images of the fibrin networks with bright field images of the cell. (C and D) Time projections of time-lapse movies (taken at a fixed confocal  $xy$ -plane) of cell-populated fibrin gels with fibrin concentrations of 2 mg/ml (C) and 3 mg/ml (D) obtained during fibrin polymerization and subsequent cell spreading. White arrows point to the location of a cell (which can be seen by differential interference contrast microscopy, see insets). Boxes indicate cells that are in focus during the time sequence. The corresponding time-lapse movies are shown in Movie S6 and Movie S7, combined with particle image velocimetry analysis. Maximum intensity projections were obtained from  $z$ -stacks of 40 images over a total depth of  $40 \mu\text{m}$  (A and B), whereas the time projections are obtained from 47 images (C, total time 7.5 h) or 54 images (D, total time 9 h). To see this figure in color, go online.

are several signatures of cellular contraction: the fibrin network is highly condensed adjacent to the cell body and fibrin fibers within a distance of  $\sim 30\text{--}40 \mu\text{m}$  from the cell surface are radially oriented toward the cell. Local condensation and alignment of matrix fibers around cells, especially near pseudopodial protrusions, is indeed commonly reported in 3D matrices (63–66). The network becomes noticeably more heterogeneous when the cell density is increased from 125 to 500 and 850 cells/ $\mu\text{l}$  (Fig. S4). However, the estimated volume fraction of cells was always below 1%, so the network structure on larger length scales (tens to hundreds of microns) remained homogeneous. Image analysis of the fiber orientations shows that the networks also remained mostly isotropic (Fig. S4).

Time-lapse movies of polymerizing networks show that cells exert contractile forces on the network that reach up to distances of at least  $100 \mu\text{m}$  away from the cell surface (see Movie S6 and the *time-projection* in Fig. 3 C, where the cells are indicated by white arrows). Strikingly, these large network deformations are only seen in dilute networks (2 mg/ml fibrin or less). In denser gels, network deformation is negligible over a time span of at least 7.5 h (Movie S7 and the *time-projection* in Fig. 3 D, for a 3 mg/ml gel).

To quantify network deformation during cell adhesion and spreading, we tracked the positions of fiducial markers ( $1 \mu\text{m}$  spheres) attached to the network in the vicinity of spreading cells. As shown by Movie S4 of a cell spreading in a 1 mg/ml fibrin gel, cells are initially round but start to spread and deform after  $\sim 1$  h. As the cell spreads, it pulls the surrounding probe particles inwards. The bead displacements were quantified by tracking their centroid positions over time (Fig. 4, black lines, each corresponding to a different particle). After  $\sim 1$  h of culture, the majority of the particles started to be pulled toward the spreading cell. After  $\sim 3$  h, the motion of the probe particles ceased, indicating the onset of mechanical equilibrium between the cell traction forces and the elastic resistance of the fibrin gel (67). This timescale is consistent with the time-lapse movies of spreading cells (Fig. 2), which showed that cell spreading was complete within 4 to 6 h. After 6 h, only local rearrangements of the fibrin network occurred, as shown by particle image velocimetry analysis of the time-lapse movies of polymerizing cell-seeded fibrin gels ( $< 3$  mg/ml, see supporting information and Movie S6). To test whether cells are still metabolically active once bead movement ceases, we added the peptide GRGDS to the cell culture medium (see supporting information). This peptide disrupts cell attachment to the fibrin network by competing for the integrin receptor  $\alpha\text{V}\beta 3$  (Fig. S5) (64,68). Around 1 h after addition of GRGDS to the medium, we observe a sudden recoil of the particles surrounding the cells (Movie S5), showing that tension is suddenly released and implying that cells indeed actively maintain tension. Strikingly, cells in denser ( $\geq 3$  mg/ml) gels spread without noticeably deforming the surrounding fibrin network in a timescale of 7.5 h (Movie S7).

## Rheology of cell-populated fibrin gels

Because fibrin gels are known to stiffen strongly when subject to an external load, we hypothesized that active cell contraction may increase the elastic modulus of fibrin gels (38–40). To test this hypothesis, we measured the linear elastic modulus,  $G'$ , of fibrinogen solutions with and without cells during polymerization by macroscopic shear rheology. In the absence of cells,  $G'$  immediately started to increase and reached a plateau after  $\sim 3$  h (blue line in Fig. 4). This increase reflects fast polymerization of fibrin into a space-filling elastic network, followed by a slower process of covalent cross-linking by FXIIIa (69,70). In the presence of cells, we also observed an immediate increase of  $G'$ , but it took 4 h to reach a constant value of  $G'$  and the increase of  $G'$  was biphasic, with an inflection around 2 h (red line in Fig. 4). The first phase of network stiffening likely corresponds to the same network formation process that occurs in the absence of cells. The second phase of network stiffening approximately coincides with the onset of cell spreading (black lines in Fig. 4). We note, though, that the onset of cell spreading varied from 30 to 70 min, probably due to variations in the delay between cell harvesting and the start of the experiments and to the fact that cells need  $\sim 1$  h to reexpress integrins after trypsinization (71). A similar biphasic stiffening response was observed in fibrin gels and plasma clots containing contractile platelets (72). Over the entire range of fibrin concentrations (0.2–6 mg/ml) studied, mechanical equilibrium (i.e., a constant  $G'$ ) was reached within

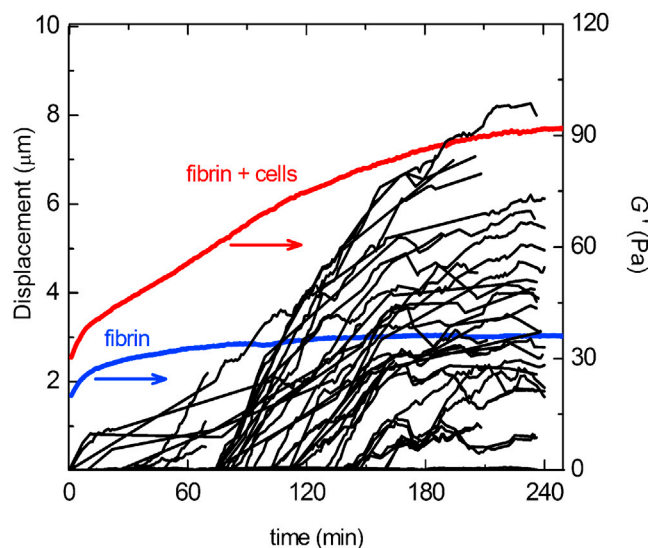

**FIGURE 4** Examples of the increase in traction strain and macroscopic elastic modulus of a cell-populated fibrin gel over time, during fibrin polymerization and subsequent cell spreading. The traction strain was quantified by measuring the displacements of fiducial markers ( $1\ \mu\text{m}$  diameter beads) embedded in the fibrin networks toward a spreading cell (black lines). The elastic modulus,  $G'$ , was measured by macroscopic rheology (red line). The fibrin concentration was  $1\ \text{mg/ml}$  and the cell density was  $500/\mu\text{L}$ . For reference, the blue curve shows  $G'$  for a fibrin gel without cells. To see this figure in color, go online.

4–6 h. This timescale is consistent with the bead tracking data and the time-lapse images of spreading cells shown earlier. However, the morphology of cells inside the rheometer might differ from that seen in the cell spreading assays due to strain shielding at small strains, as was seen in collagen gels (73).

In steady state, the fibrin networks behaved as near-perfect elastic solids, with a frequency-independent elastic modulus (Fig. S6) and a very small loss tangent,  $G''/G'$ , which decreased about 10-fold, from  $\sim 0.05$  to  $0.006$ , when the fibrin concentration was increased from  $0.2$  to  $6\ \text{mg/ml}$  (see Fig. 5 B). This solid-like behavior is caused by the presence of covalent bonds between fibrin monomers within and between fibers created by the enzymatic activity of FXIIIa (39). In the absence of cells, the elastic plateau modulus,  $G_0$ , increased nearly quadratically with fibrinogen concentration over the range of  $0.5$ – $6\ \text{mg/ml}$  (blue circles in Fig. 5 A). In the presence of cells,  $G'$  was threefold higher than for the cell-free gels when the fibrin concentration was  $2\ \text{mg/ml}$  or less (red squares in Fig. 5 A; differences are statistically significant for fibrin concentrations with  $p < 0.1$  below  $2\ \text{mg/ml}$  and  $p < 0.01$  at  $2\ \text{mg/ml}$ ). However,

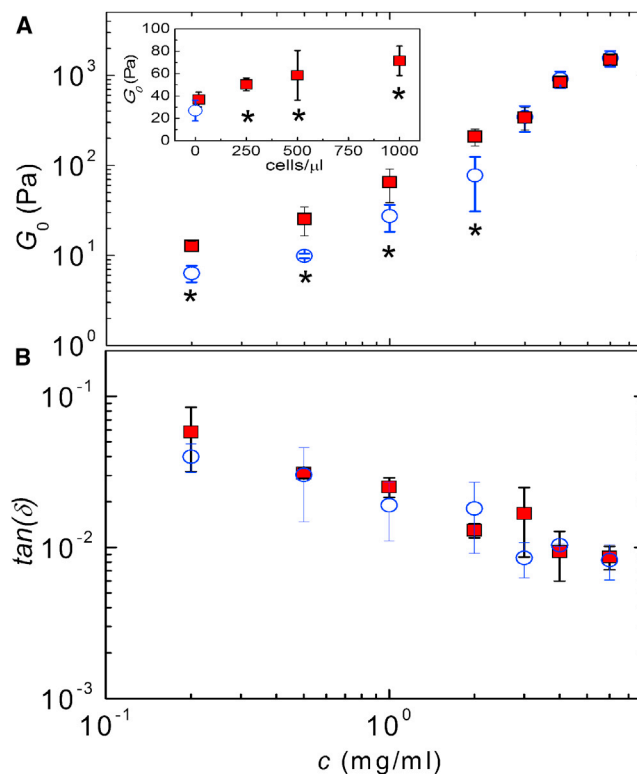

**FIGURE 5** Linear viscoelastic shear moduli of fibrin gels with and without cells (at  $\omega = 1\ \text{rad/s}$ ). (A) The elastic modulus,  $G'$ , is shown as a function of fibrin concentration for fibrin gels without cells (open circles) and with  $500\ \text{cells}/\mu\text{L}$  (closed squares). Inset:  $G'$  of  $1\ \text{mg/ml}$  fibrin gels as a function of cell density; the open circle corresponds to the cell-free case. (B) Loss tangent,  $G''/G'$ , corresponding to the data shown in A. Asterisks denote statistically significant differences ( $p \leq 0.1$ ) compared to the unseeded (cell-free) case. To see this figure in color, go online.

at fibrin concentrations above 2 mg/ml, the cells did not significantly influence the elastic modulus. The viscous modulus,  $G''$ , increased by about the same factor as  $G'$  (Fig. S7). As a result, the loss tangent of gels with cells (*solid squares*) was indistinguishable from that of gels without cells (*open circles*).

To test whether the stiffening effect depends on cell density, we measured  $G_0$  for fibrin gels of 1 mg/ml and 4 mg/ml. At 1 mg/ml (*inset of Fig. 5 A*), the cells indeed increased  $G_0$  in a dose-dependent manner (*solid squares*), giving an increase relative to the cell-free gel (*open circle*) ranging from a factor 1.4 at 16 cells/ $\mu\text{L}$  (not significant,  $p = 0.18$ ) to a factor 2.7 at 1000 cells/ $\mu\text{L}$  (significant with  $p < 0.1$ ). At 4 mg/ml (Fig. S8), cells also increase  $G_0$ , but only at densities of 5000 cells/ $\mu\text{L}$ , corresponding to a volume fraction of  $\sim 4\%$ .

To test whether the stiffening of the fibrin gels in the presence of cells is caused by cell-mediated contractile prestress rather than by cells acting as cross-linkers, we compared the nonlinear rheology of fibrin networks with and without cells using a prestress method. We subjected gels to a macroscopic shear stress,  $\sigma_0$ , and measured the differential shear modulus,  $K'(\sigma_0)$ , with a small superposed oscillatory stress. If cells stiffen gels by exerting contractile prestress, we expect convergence of the elastic moduli of cell-seeded and unseeded gels as soon as  $\sigma_0$  exceeds the contractile prestress (9). If, in contrast, cells act merely as cross-linkers, we expect that the cell-seeded gels will be stiffer than unseeded gels independent of  $\sigma_0$ . In the absence of cells,  $K'(\sigma_0)$  increased with stress until the gels broke at a maximum stress level,  $\sigma_{\text{max}}$ , as illustrated for gels of 1 mg/ml (*open squares*), 2 mg/ml (*open circles*), and 6 mg/ml (*open triangles*) fibrin in Fig. 6 A. The maximum extent of strain stiffening before breakage, as quantified by the ratio  $K_{\text{max}}/G_0$ , was close to a value of 100 for gels of 0.2–3 mg/ml and decreased to 10 for gels of 6 mg/ml fibrin (*open circles* in Fig. S9 D). The nonlinear elastic response in the presence of cells (*solid symbols* in Fig. 6 A) was qualitatively similar to the behavior of unseeded gels. The gels again had a linear regime for stress levels below a critical stress,  $\sigma_{\text{crit}}$ , and stiffened at larger stress levels until the breakage stress,  $\sigma_{\text{max}}$ , was reached. For dense gels ( $\geq 3$  mg/ml fibrin), the entire stress dependence of  $K'$  of cell-seeded and acellular gels was indistinguishable (*triangles*). However, for dilute gels ( $\leq 2$  mg/ml fibrin) the cells caused a clear increase of the linear elastic modulus, while leaving the high-stress response unchanged. The maximum shear stress,  $\sigma_{\text{max}}$ , supported by the gels was unchanged by the presence of cells (Fig. S9 C), and the maximum elastic modulus,  $K_{\text{max}}$ , was likewise unchanged. Consequently, the relative degree of stress stiffening before breakage,  $K_{\text{max}}/G_0$ , was  $\sim$ threefold lower for cell-seeded gels than for acellular gels (Fig. S9 D). When we increased the cell density, we observed an even more pronounced increase of the linear modulus, but the high-stress response still remained unchanged (Fig. 6 B).

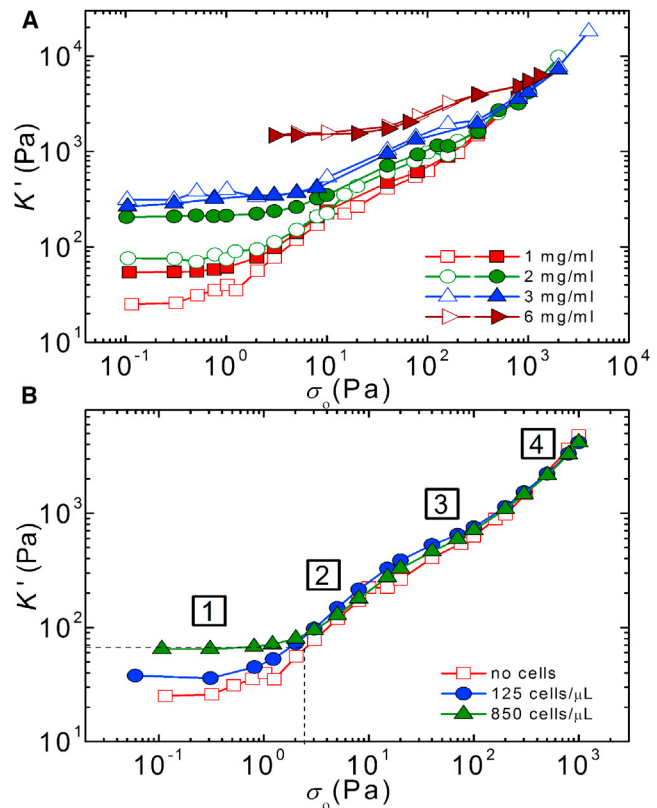

FIGURE 6 Stress-stiffening response of fibrin gels with and without cells. (A) Tangent elastic modulus,  $K'$ , as a function of external (*macroscopic*) shear stress,  $\sigma_0$ , for fibrin gels with different concentrations (see legend) without cells (*open symbols*) and with cells (*solid symbols*, 500 cells/ $\mu\text{L}$ ). (B)  $K'$  as a function of  $\sigma_0$  for a fibrin gel (1 mg/ml) containing cells at different densities (see legend). By comparing the stiffening curves of cell-seeded and cell-free gels, we estimate the cell-induced prestress (*vertical dotted line*) as the  $\sigma$ -value where the apparent linear modulus of the cell-populated gel matches the  $K'$ -value on the stiffening curve of the acellular gel (*horizontal dotted line*). The curves show a linear elastic regime (*labeled 1*) followed by a nonlinear response with three regimes with a distinct  $\sigma_0$ -dependence (*labeled 2 to 4*), see main text for details. To see this figure in color, go online.

These observations strongly support our hypothesis that cells stiffen the gels by an active mechanism, involving contractile prestress. Indeed, tests with blebbistatin, which specifically inhibits myosin II contractile activity (74), show that myosin activity is a requirement for cell-induced stiffening (Fig. S10).

The increased stiffness of the cell-seeded gels coincided with a postponement of the onset of stress stiffening (Fig. S9 A). In the absence of cells, the critical stress,  $\sigma_{\text{crit}}$ , increased more than 10-fold when the fibrin concentration was raised from 0.6 to 6 mg/ml (*open circles* in Fig. S9 A). The corresponding critical strain,  $\gamma_{\text{crit}}$ , was 30% for the most dilute gels (0.2 and 0.5 mg/ml) and only 1–3% for the more concentrated gels (*open circles* in Fig. S9 B). The cells increased  $\sigma_{\text{crit}}$  and decreased  $\gamma_{\text{crit}}$  for gels with fibrin concentrations below 2 mg/ml ( $p < 0.06$ ). Similar to the cell-free gels, there appeared to be two



distinct concentration regimes for  $\gamma_{\text{crit}}$ , with  $\gamma_{\text{crit}} \approx 10\%$  for 0.2 and 0.5 mg/ml fibrin and  $\gamma_{\text{crit}} \approx 1\%$  at higher fibrin concentrations.

## DISCUSSION

### Cells stiffen fibrin gels by generating contractile prestress

We showed that fibroblasts seeded inside extracellular matrices prepared from purified human fibrinogen cause macroscopic matrix stiffening. The extent of stiffening increases with increasing cell density, reaching a maximum of threefold stiffening over cell-free gels at 1000 cells/ $\mu\text{L}$ . At higher cell densities, cells caused macroscopic contraction and detachment from the rheometer plates. Stiffening was apparent only in dilute fibrin scaffolds of 2 mg/ml or less. These findings are consistent with several prior studies, showing comparable degrees of stiffening in case of fibroblasts and mesenchymal stem cells (factor 2–4 stiffening, at a similar cell density as ours (45)) and platelets (factor 10 stiffening, but at a 100-fold larger cell density compared to our study (44,72)). A similar extent of cell-induced stiffening was also reported for frog embryonic tissue (75). In these earlier studies, it was already hypothesized that the stiffening effect may be caused by active contractility of the cells, which may drive the gel into a nonlinear, stress-stiffened state. In our work, we systematically tested this hypothesis. Here, we showed by rheology measurements in the presence of the myosin inhibitor blebbistatin that cell-induced gel stiffening indeed requires myosin-driven contractility.

We observed a clear correlation between the onset of gel stiffening and the onset of cell spreading. Time-dependent rheometry showed that the cells started to stiffen the fibrin gels ~1–3 h after cell seeding, which coincided with the moment where microscopy showed that cells started to attach to the gels and spread. Fibrin network formation was largely complete within the first hour (Fig. S2), well before the cells began to spread. In the process of spreading, the cells applied inward (traction) forces to the fibrin fibers and caused fibrin gel compaction, but only near the cell edges. This compaction was only seen in dilute ( $\leq 2$  mg/ml) fibrin gels. Once the cells were fully spread (~6 h after seeding), they maintained active tension in the surrounding fibrin network. This was apparent from the abrupt release of tension when GRGDS was added to block the RGD-binding integrins (64,68,76). The elastic modulus of the cell-seeded gels reached a constant value once the cells were well spread.

Cell-induced gel stiffening could in principle arise either from active traction forces, which prestress the network (77–79) or from a passive cross-linking effect of the cells (80,81). We consider the latter explanation unlikely, because the cells take up  $<1\%$  of the total sample volume, based on

an average cell diameter of 25  $\mu\text{m}$ . Moreover, the close correspondence of the time dependence of cell spreading and gel stiffening strongly suggests that cell traction forces are related to gel stiffening. This interpretation is further supported by tests with blebbistatin, showing that myosin inhibition prevents gel stiffening (Fig S10). A direct comparison of the nonlinear elastic behavior of cell-seeded and cell-free gels also supports an active mechanism. The cell-seeded gels have a higher elastic modulus than acellular gels at low shear stress, but an identical elastic modulus at high shear stress. Furthermore, the cell-seeded gels have a smaller critical strain than cell-free gels. These observations indicate that the cells generate an internal prestress that brings the fibrin gels in a nonlinear stress-stiffened state. The stiffness of the cell-seeded gels is controlled by a sum of the active prestress and the externally applied shear stress. Fig. 6 B illustrates the concept by comparing stress-stiffening curves of a cell-seeded fibrin gel (green triangles) with that of a cell-free gel (red squares). The cell-seeded gel has an initial modulus (horizontal dotted line) that corresponds to the modulus of the cell-free gel under an external shear stress of ~2 Pa (vertical dotted line). At shear stresses larger than 2 Pa, the cell-seeded gel starts to stiffen and its nonlinear modulus coincides with that of the cell-free gel. The maximal modulus reached before breakage is the same for the cellular and acellular gels. Because the cellular gel starts out in a prestressed, stiffened state, the total degree of gel stiffening caused by the external stress (given by the ratio  $K_{\text{max}}/G_0$ ) is less than for the acellular gel. We note that these observations are qualitatively consistent with prior large amplitude oscillatory shear measurements of fibrin gels and plasma clots containing platelets (72). The platelets, similar to the fibroblasts studied here, increased  $G_0$  (by a factor of 5), although having no effect on gel stiffness at large levels of shear stress. Moreover, similar to the fibroblasts studied here, the platelets postponed the onset of strain stiffening to larger values of  $\sigma_{\text{crit}}$  and reduced the maximum extent of strain stiffening before gel breakage.

The external shear stress where the nonlinear modulus of the acellular gel matches the linear modulus of the cellular gel can provide an estimate of the global prestress in the cell-seeded gels generated by the cells (9). The prestress thus estimated increases roughly linearly with increasing cell density, going from 1 Pa for 16 cells/ $\mu\text{L}$  to 3 Pa at 1000 cells/ $\mu\text{L}$  in gels of a constant (1 mg/ml) fibrin concentration (open circles in Fig. 7 A). At fixed cell density (500 cells/ $\mu\text{L}$ ), the prestress increases from 0.5 to 9 Pa as the fibrin concentration is increased from 0.2 to 2 mg/ml (Fig. 7 B). However, at fibrin concentrations of 3 mg/ml and higher, there is no measurable prestress, because the elastic moduli of cellular and acellular gels are indistinguishable. This does not necessarily imply that the prestress is zero, because the prestress may be less than the critical stress needed to induce strain stiffening

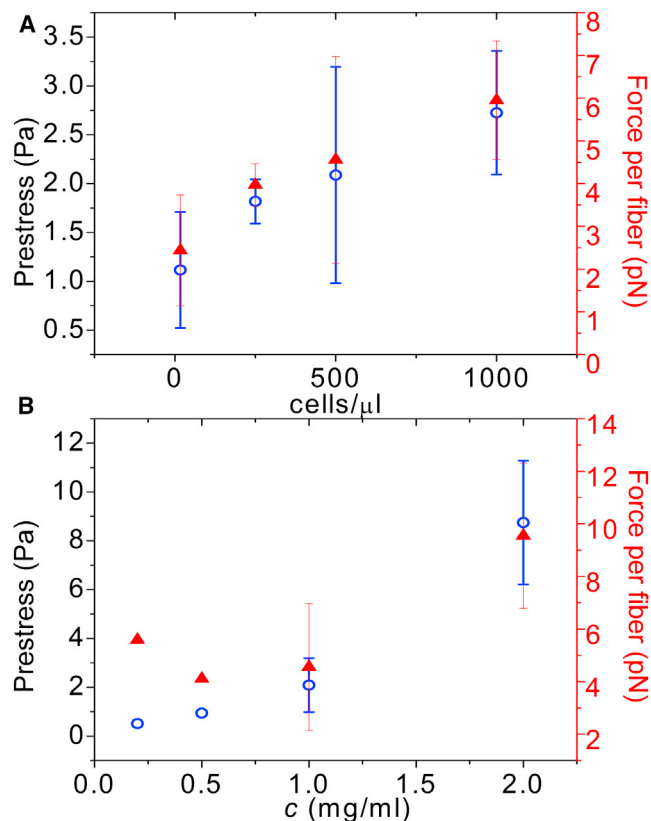

FIGURE 7 Cell-mediated prestress (left axis, open circles) determined by comparing the stress-stiffening response of cellular and acellular gels according to the procedure shown in Fig. 6 B, and corresponding calculated average force per fibrin fiber (right axis, solid triangles). (A) Prestress as a function of cell density in gels of fixed fibrin concentration (1 mg/ml). (B) Prestress as a function of fibrin concentration at a fixed cell density (500 cells/ $\mu$ L). To see this figure in color, go online.

( $\sigma_{\text{crit}} = 7$  Pa at 3 mg/ml). However, bright field imaging did show that the cells are less well spread in dense (3–6 mg/ml) fibrin gels than in dilute (0.2–2 mg/ml) gels. Cells in denser gels are less elongated and generate much shorter protrusions than in more dilute gels (Fig. 2 and Fig S3). On two-dimensional (2D) gels, less-spread cells tend to exert smaller traction forces than well-spread cells (16,23,82), which raises the possibility that cells in dense fibrin gels exert smaller traction forces than in dilute gels. Recent work suggests that matrix-embedded cells mainly generate traction along their pseudopodial protrusions (83,84). The reduced tendency of the cells to form pseudopods in dense gels may therefore also contribute to a smaller overall prestress. However, a direct measurement of traction forces on a microscopic scale in the fibrin network immediately adjacent to the cells will be needed to verify this hypothesis (19).

From the prestress values, we can estimate an average traction force experienced by each fibrin fiber by dividing the prestress by the total filament length density,  $\rho$ . We find an average force per fiber between 2 and 10 pN,

depending on cell density and fibrin concentration (solid triangles in Fig. 7, A and B). These values are considerably lower than traction forces reported by other techniques and in a variety of ECM materials (17–19,85). This is expected, because the numbers reported here are ensemble averages over the entire cell population. In the local vicinity of cells, we expect higher force levels than in the regions between cells.

Interestingly, the reduced cell spreading in denser fibrin gels is in apparent contradiction with studies of cell spreading on planar (2D) elastic substrates, where increased substrate stiffness tends to promote cell spreading (10,20,22,82). However, in 3D matrices several other factors can influence cell spreading behavior, such as differences in local stiffness, ligand density, porosity, and three-dimensionality of cell surface receptor engagement. Changing the fibrin concentration changes not only the stiffness, but also the matrix porosity. The average mesh size determined by confocal microscopy decreases as a square root in fibrin concentration, going from 10  $\mu$ m at 0.1 mg/ml fibrin to 2  $\mu$ m at 6 mg/ml fibrin (39). The small mesh size of the denser gels may constrain the cell body and also impede the extension of pseudopods. In the future, it will be interesting to find alternative ways to modify the matrix rigidity without changing the network architecture.

### Mechanistic origin of fibrin gel stiffening

The nonlinear elastic modulus of the fibrin gels has a remarkably complex dependence on stress, with four distinct phases, as indicated in Fig. 6 B. We recently showed that these four phases reflect the hierarchical structure of fibrin networks (39). At small stress, excess length between cross-link points stemming from thermal bending fluctuations are pulled out, giving rise to an initial linear regime (regime 1) followed by an entropic stiffening response (regime 2). Despite their large thickness ( $\sim 100$  nm), the fibers do exhibit significant thermal fluctuations because they are composed of semiflexible protofibrils that are loosely bundled by flexible linker chains. Due to this bundle-like architecture, the fibers have a persistence length of 20–30  $\mu$ m,  $\sim 100$ -fold more flexible than anticipated from continuum arguments. However, it is likely that for fibrin gels prepared under conditions where the fibers are thicker or the mesh size is larger, entropy no longer plays an important role. In these cases, we instead expect nonaffinity to govern the low-stress response (86).

As the stress is raised further, the fibers themselves are axially stretched, causing a small regime of constant elastic modulus (regime 3) followed by another strain-stiffening regime (regime 4). The stiffening at large stress suggests that the fibers themselves have an inherently nonlinear force-extension response. Direct force-extension measurements using atomic force microscopy have indeed demonstrated strain stiffening on the level of individual fibrin



fibers, though the exact molecular origin is still under debate. Possible explanations are stretching of flexible alpha-C linker regions that connect the protofibrils within a fiber (39,87) or forced-unfolding of the fibrin monomers (40,88–90).

Remarkably, the cells only influence regimes 1 and 2 of the nonlinear response of the fibrin gels. In regimes 3 and 4, where the fibrin fibers themselves are axially stretched, the stiffening curves for cell-populated gels are identical to those of cell-free gels (Fig. 6, A and B). This observation indicates that the stress/strain applied by the cells is sufficient to stretch out thermal undulations of the fibrin fibers between cross-link points, thereby increasing the elastic modulus in regime 1 and shifting the onset of regime 2 to a larger critical stress. However, the cells are apparently unable to stretch out the backbone of the fibrin fibers. Indeed, the forces reported in Fig. 7 are insufficient for causing forced unfolding of fibrin monomers, which requires forces on the order of 100 pN (88). Strain stiffening of individual fibrin fibers requires large strains on the order of 100% (87). We cannot exclude that backbone stretching occurs locally in a few highly strained fibrin fibers, but we can exclude that it occurs on a macroscopic scale.

The cell-induced stiffening of the fibrin gels is an analog of rheological measurements of reconstituted actin-myosin gels (8,9). Contractile prestress generated by myosin II motors was shown to produce identical stiffening as an external stress applied by shearing actin networks (9). The active prestress reached values equivalent to an external stress of 14 Pa. The average force per actin filament (which may be calculated from the known mass concentration and mass per length ratio of actin fibers (91) was 0.3 pN. Consistent with the fact that cells contain many myosin II motor molecules, the average force in the actin-myosin networks is an order of magnitude lower than the forces we find for cell-mediated matrix stiffening.

### Implications of cell-induced stiffening

In recent years, various quantitative techniques (collectively known as traction force microscopy) have been developed to measure traction forces exerted by cells on 2D substrates (15,16,92) and inside 3D hydrogels (19,83,85). The basic idea is to measure the strain field in the substrate by tracking the displacements of fiducial markers and to convert strains into traction forces by using an appropriate elastic model for the substrate. This conversion requires certain assumptions, such as continuum elasticity and linearity. These assumptions are reasonable for typical synthetic hydrogels such as polyacrylamide, but are invalid in physiologically relevant fibrous materials such as collagen or fibrin networks (93,94). Our results show that cells are able to induce active stiffening of fibrin matrices, which should be taken into account in future attempts to perform traction force microscopy in 3D matrices.

Cell-induced stiffening also has implications for understanding tissue behavior during tissue development and homeostasis. By locally pulling on the matrix, cells can sense and respond to mechanical changes of the ECM. However, at the same time they also actively change the stiffness and tension in the ECM, thus creating a mechanical feedback loop (95). This effect may explain recent findings showing that fibroblasts and human mesenchymal stem cells plated on soft fibrin gels behaved the same as on stiff 2D substrates, suggesting that the cells respond to the gel's high-strain modulus (45). Cell-induced matrix stiffening may also result in a feedback loop enhancing cellular contractility, development of stress fibers, and growth of adhesions (27). Furthermore, the nonlinear elastic response of the ECM on cell contractility will likely influence the mechanical interactions among cells during tissue morphogenesis, a phenomenon which has been seen experimentally (31,32,96) as well as theoretically (97–100). Studies of cells cultured in/on linearly elastic materials have shown that stem cell fate can be controlled by changing matrix stiffness (23,101), which implies that scaffold stiffness is a key design parameter for biomaterial scaffolds for tissue repair. Because of its natural function in angiogenesis and wound repair, fibrin is particularly popular for applications in tissue engineering of cartilage, cardiac muscle, skin, nerve, and vascular tissue (53,102). Given that matrix stiffness is an important design parameter, cell-induced stiffening is thus an important factor.

### CONCLUSION

Here, we have shown that fibroblasts stiffen tissue-like fibrin matrices by applying contractile forces against the extracellular matrix that bring it into a stress-stiffened regime. By correlating observations of cell spreading with rheological measurements, we discovered that stiffening starts as the cells start to spread and apply contractile tension. Once the cells are well spread, they maintain an isometric contractile force on the fibrin matrix. Control tests with an actin-myosin inhibitor correlated contractile force with stiffening of fibrin gels. We found that both cell spreading and fibrin gel stiffening were sensitive to the matrix density. Cells assumed well-spread, elongated shapes with long protrusions in gels of low fibrin concentrations and spread progressively less in denser fibrin gel, remaining round with small protrusions in the densest gel tested (6 mg/ml). By directly comparing nonlinear rheology measurements on cell-seeded and cell-free gels, we conclude that cells generate traction forces that are sufficient to pull out large wavelength thermal undulations of the fibrin fibers, but insufficient to axially stretch the fibrin fibers. The mechanical properties of fibrin blood clots during wound healing, fibrosis, and cancer development are probably controlled at least in part by the nonlinear elastic response of the clots to the active internal forces generated by embedded cells.

## SUPPORTING MATERIAL

Ten figures, seven movies, supplementary data, and references (103–108) are available at [http://www.biophysj.org/biophysj/supplemental/S0006-3495\(13\)01136-3](http://www.biophysj.org/biophysj/supplemental/S0006-3495(13)01136-3).

The authors thank Prof. J. Boonstra for his gift of the fibroblasts, Oscar Stassen and Elly Hol for performing qPCR, William Thielicke for sending documentation on the program PIVlab, and José Alvarado for help with OrientationJ analysis.

This work is part of the research programme of the Foundation for Fundamental Research on Matter (FOM), which is financially supported by the Netherlands Organisation for Scientific Research (NWO). This work is further supported by NanoNextNL, a micro and nanotechnology programme of the Dutch Government and 130 partners.

## REFERENCES

- Mackintosh, F. C., and C. F. Schmidt. 2010. Active cellular materials. *Curr. Opin. Cell Biol.* 22:29–35.
- Howard, J. 2001. *Mechanics of Motor Proteins and the Cytoskeleton*. Sinauer, Sunderland, MA.
- Wang, N., K. Naruse, ..., D. E. Ingber. 2001. Mechanical behavior in living cells consistent with the tensegrity model. *Proc. Natl. Acad. Sci. USA.* 98:7765–7770.
- Fernández, P., P. A. Pullarkat, and A. Ott. 2006. A master relation defines the nonlinear viscoelasticity of single fibroblasts. *Biophys. J.* 90:3796–3805.
- Gallet, F., D. Arcizet, ..., A. Richert. 2009. Power spectrum of out-of-equilibrium forces in living cells: amplitude and frequency dependence. *Soft Matter.* 5:2947–2953.
- Kollmannsberger, P., C. Mierke, and B. Fabry. 2011. Nonlinear viscoelasticity of adherent cells is controlled by cytoskeletal tension. *Soft Matter.* 7:3127–3132.
- Crow, A., K. D. Webster, ..., D. A. Fletcher. 2012. Contractile equilibration of single cells to step changes in extracellular stiffness. *Biophys. J.* 102:443–451.
- Mizuno, D., C. Tardin, ..., F. C. Mackintosh. 2007. Nonequilibrium mechanics of active cytoskeletal networks. *Science.* 315:370–373.
- Koenderink, G. H., Z. Dogic, ..., D. A. Weitz. 2009. An active biopolymer network controlled by molecular motors. *Proc. Natl. Acad. Sci. USA.* 106:15192–15197.
- Solon, J., I. Levental, ..., P. A. Janmey. 2007. Fibroblast adaptation and stiffness matching to soft elastic substrates. *Biophys. J.* 93:4453–4461.
- Mitrossilis, D., J. Fouchard, ..., A. Asnacios. 2010. Real-time single-cell response to stiffness. *Proc. Natl. Acad. Sci. USA.* 107:16518–16523.
- Geiger, B., J. P. Spatz, and A. D. Bershadsky. 2009. Environmental sensing through focal adhesions. *Nat. Rev. Mol. Cell Biol.* 10:21–33.
- Bischofs, I. B., and U. S. Schwarz. 2003. Cell organization in soft media due to active mechanosensing. *Proc. Natl. Acad. Sci. USA.* 100:9274–9279.
- Zemel, A., R. De, and S. Safran. 2011. Mechanical consequences of cellular force generation. *Curr. Opin. Solid State Mater. Sci.* 15:169–176.
- Dembo, M., and Y. L. Wang. 1999. Stresses at the cell-to-substrate interface during locomotion of fibroblasts. *Biophys. J.* 76:2307–2316.
- Balaban, N. Q., U. S. Schwarz, ..., B. Geiger. 2001. Force and focal adhesion assembly: a close relationship studied using elastic micro-patterned substrates. *Nat. Cell Biol.* 3:466–472.
- Freyman, T. M., I. V. Yannas, ..., L. J. Gibson. 2002. Fibroblast contractile force is independent of the stiffness which resists the contraction. *Exp. Cell Res.* 272:153–162.
- Harley, B. A., T. M. Freyman, ..., L. J. Gibson. 2007. A new technique for calculating individual dermal fibroblast contractile forces generated within collagen-GAG scaffolds. *Biophys. J.* 93:2911–2922.
- Legant, W. R., J. S. Miller, ..., C. S. Chen. 2010. Measurement of mechanical tractions exerted by cells in three-dimensional matrices. *Nat. Methods.* 7:969–971.
- Pelham, Jr., R. J., and Yl. Wang. 1997. Cell locomotion and focal adhesions are regulated by substrate flexibility. *Proc. Natl. Acad. Sci. USA.* 94:13661–13665.
- McBeath, R., D. M. Pirone, ..., C. S. Chen. 2004. Cell shape, cytoskeletal tension, and RhoA regulate stem cell lineage commitment. *Dev. Cell.* 6:483–495.
- Yeung, T., P. C. Georges, ..., P. A. Janmey. 2005. Effects of substrate stiffness on cell morphology, cytoskeletal structure, and adhesion. *Cell Motil. Cytoskeleton.* 60:24–34.
- Engler, A. J., S. Sen, ..., D. E. Discher. 2006. Matrix elasticity directs stem cell lineage specification. *Cell.* 126:677–689.
- Klein, E. A., L. Yin, ..., R. K. Assoian. 2009. Cell-cycle control by physiological matrix elasticity and in vivo tissue stiffening. *Curr. Biol.* 19:1511–1518.
- Wang, N., J. D. Tytell, and D. E. Ingber. 2009. Mechanotransduction at a distance: mechanically coupling the extracellular matrix with the nucleus. *Nat. Rev. Mol. Cell Biol.* 10:75–82.
- Wozniak, M. A., and C. S. Chen. 2009. Mechanotransduction in development: a growing role for contractility. *Nat. Rev. Mol. Cell Biol.* 10:34–43.
- Paszek, M. J., N. Zahir, ..., V. M. Weaver. 2005. Tensional homeostasis and the malignant phenotype. *Cancer Cell.* 8:241–254.
- Butcher, D. T., T. Alliston, and V. M. Weaver. 2009. A tense situation: forcing tumour progression. *Nat. Rev. Cancer.* 9:108–122.
- Jaalouk, D. E., and J. Lammerding. 2009. Mechanotransduction gone awry. *Nat. Rev. Mol. Cell Biol.* 10:63–73.
- Frantz, C., K. M. Stewart, and V. M. Weaver. 2010. The extracellular matrix at a glance. *J. Cell Sci.* 123:4195–4200.
- Bell, E., B. Ivarsson, and C. Merrill. 1979. Production of a tissue-like structure by contraction of collagen lattices by human fibroblasts of different proliferative potential in vitro. *Proc. Natl. Acad. Sci. USA.* 76:1274–1278.
- Harris, A. K., D. Stopak, and P. Wild. 1981. Fibroblast traction as a mechanism for collagen morphogenesis. *Nature.* 290:249–251.
- Fernandez, P., and A. R. Bausch. 2009. The compaction of gels by cells: a case of collective mechanical activity. *Integr. Biol. (Camb).* 1:252–259.
- Bischofs, I. B., F. Klein, ..., U. S. Schwarz. 2008. Filamentous network mechanics and active contractility determine cell and tissue shape. *Biophys. J.* 95:3488–3496.
- Mutsaers, S. E., J. E. Bishop, ..., G. J. Laurent. 1997. Mechanisms of tissue repair: from wound healing to fibrosis. *Int. J. Biochem. Cell Biol.* 29:5–17.
- Urech, L., A. G. Bittermann, ..., H. Hall. 2005. Mechanical properties, proteolytic degradability and biological modifications affect angiogenic process extension into native and modified fibrin matrices in vitro. *Biomaterials.* 26:1369–1379.
- Kniazeva, E., and A. J. Putnam. 2009. Endothelial cell traction and ECM density influence both capillary morphogenesis and maintenance in 3-D. *Am. J. Physiol. Cell Physiol.* 297:C179–C187.
- Storm, C., J. J. Pastore, ..., P. A. Janmey. 2005. Nonlinear elasticity in biological gels. *Nature.* 435:191–194.
- Piechocka, I. K., R. G. Bacabac, ..., G. H. Koenderink. 2010. Structural hierarchy governs fibrin gel mechanics. *Biophys. J.* 98:2281–2289.
- Brown, A. E., R. I. Litvinov, ..., J. W. Weisel. 2009. Multiscale mechanics of fibrin polymer: gel stretching with protein unfolding and loss of water. *Science.* 325:741–744.

41. Lindström, S. B., D. A. Vader, ..., D. A. Weitz. 2010. Biopolymer network geometries: characterization, regeneration, and elastic properties. *Phys. Rev. E Stat. Nonlin. Soft Matter Phys.* 82:051905.
42. Budtz-Olsen, O. 1951. Clot Retraction. Charles C. Thomas, Springfield, Illinois.
43. Niewiarowski, S., E. Regoeczi, and J. F. Mustard. 1972. Adhesion of fibroblasts to polymerizing fibrin and retraction of fibrin induced by fibroblasts. *Proc. Soc. Exp. Biol. Med.* 140:199–204.
44. Jen, C. J., and L. V. McIntire. 1982. The structural properties and contractile force of a clot. *Cell Motil.* 2:445–455.
45. Winer, J. P., S. Oake, and P. A. Janmey. 2009. Non-linear elasticity of extracellular matrices enables contractile cells to communicate local position and orientation. *PLoS ONE.* 4:e6382.
46. Wakatsuki, T., M. S. Kolodney, ..., E. L. Elson. 2000. Cell mechanics studied by a reconstituted model tissue. *Biophys. J.* 79:2353–2368.
47. Evans, M. C., and V. H. Barocas. 2009. The modulus of fibroblast-populated collagen gels is not determined by final collagen and cell concentration: Experiments and an inclusion-based model. *J. Biomech. Eng.* 131:101014.
48. Jordan, A., A. Duperray, ..., C. Verdier. 2010. Breakdown of cell-collagen networks through collagen remodeling. *Biorheology.* 47:277–295.
49. Gurtner, G. C., S. Werner, ..., M. T. Longaker. 2008. Wound repair and regeneration. *Nature.* 453:314–321.
50. Falanga, A., M. Marchetti, ..., D. Balducci. 2003. Clotting mechanisms and cancer: implications in thrombus formation and tumor progression. *Clin. Adv. Hematol. Oncol.* 1:673–678.
51. Tuan, T. L., A. Song, ..., M. E. Nimni. 1996. In vitro fibroplasia: matrix contraction, cell growth, and collagen production of fibroblasts cultured in fibrin gels. *Exp. Cell Res.* 223:127–134.
52. Huang, Y. C., R. G. Dennis, ..., K. Baar. 2005. Rapid formation of functional muscle in vitro using fibrin gels. *J. Appl. Physiol.* 98:706–713.
53. Janmey, P. A., J. P. Winer, and J. W. Weisel. 2009. Fibrin gels and their clinical and bioengineering applications. *J. R. Soc. Interface.* 6:1–10.
54. Broedersz, C., K. Kasza, ..., F. MacKintosh. 2010. Measurement of nonlinear rheology of cross-linked biopolymer gels. *Soft Matter.* 6:4120–4127.
55. Mizuno, D., R. Bacabac, ..., C. F. Schmidt. 2009. High-resolution probing of cellular force transmission. *Phys. Rev. Lett.* 102:168102.
56. Redden, R. A., and E. J. Doolin. 2003. Collagen crosslinking and cell density have distinct effects on fibroblast-mediated contraction of collagen gels. *Skin Res. Technol.* 9:290–293.
57. Leung, L. Y., D. Tian, ..., D. J. Tschumperlin. 2007. A new micro-rheometric approach reveals individual and cooperative roles for TGF-beta1 and IL-1beta in fibroblast-mediated stiffening of collagen gels. *FASEB J.* 21:2064–2073.
58. Weinbaum, J. S., J. Qi, and R. T. Tranquillo. 2010. Monitoring collagen transcription by vascular smooth muscle cells in fibrin-based tissue constructs. *Tissue Eng. Part C Methods.* 16:459–467.
59. Ross, J. J., and R. T. Tranquillo. 2003. ECM gene expression correlates with in vitro tissue growth and development in fibrin gel remodeled by neonatal smooth muscle cells. *Matrix Biol.* 22:477–490.
60. Petroll, W. M., and L. Ma. 2003. Direct, dynamic assessment of cell-matrix interactions inside fibrillar collagen lattices. *Cell Motil. Cytoskeleton.* 55:254–264.
61. Cukierman, E., R. Pankov, ..., K. M. Yamada. 2001. Taking cell-matrix adhesions to the third dimension. *Science.* 294:1708–1712.
62. Fraley, S. I., Y. Feng, ..., D. Wirtz. 2010. A distinctive role for focal adhesion proteins in three-dimensional cell motility. *Nat. Cell Biol.* 12:598–604.
63. Hakkinen, K., J. Harunaga, A. Doyle, and K. Yamada. 2010. Direct comparisons of the morphology, migration, cell adhesions, and actin cytoskeleton of fibroblasts in four different three-dimensional extracellular matrices. *Tissue Eng. Part A.* 17:713–724.
64. Tuan, T. L., and F. Grinnell. 1989. Fibronectin and fibrinolysis are not required for fibrin gel contraction by human skin fibroblasts. *J. Cell. Physiol.* 140:577–583.
65. Hartmann, A., P. Boukamp, and P. Friedl. 2006. Confocal reflection imaging of 3D fibrin polymers. *Blood Cells Mol. Dis.* 36:191–193.
66. Yamato, M., E. Adachi, ..., T. Hayashi. 1995. Condensation of collagen fibrils to the direct vicinity of fibroblasts as a cause of gel contraction. *J. Biochem.* 117:940–946.
67. Ferrenq, I., L. Tranqui, ..., P. Tracqui. 1997. Modelling biological gel contraction by cells: mechanocellular formulation and cell traction force quantification. *Acta Biotheor.* 45:267–293.
68. Gailit, J., C. Clarke, ..., R. A. Clark. 1997. Human fibroblasts bind directly to fibrinogen at RGD sites through integrin alpha(v)beta3. *Exp. Cell Res.* 232:118–126.
69. Standeven, K. F., A. M. Carter, ..., R. A. Ariens. 2007. Functional analysis of fibrin gamma-chain cross-linking by activated factor XIII: determination of a cross-linking pattern that maximizes clot stiffness. *Blood.* 110:902–907.
70. Münster, S., L. M. Jawerth, ..., D. A. Weitz. 2013. Strain history dependence of the nonlinear stress response of fibrin and collagen networks. *Proc. Natl. Acad. Sci. USA.* 110:12197–12202.
71. Akiyama, S. K., and K. M. Yamada. 1985. The interaction of plasma fibronectin with fibroblastic cells in suspension. *J. Biol. Chem.* 260:4492–4500.
72. Shah, J., and J. P. Janmey. 1997. Strain hardening of fibrin gels and plasma clots. *Rheol. Acta.* 36:262–268.
73. Eastwood, M., V. C. Mudera, ..., R. A. Brown. 1998. Effect of precise mechanical loading on fibroblast populated collagen lattices: morphological changes. *Cell Motil. Cytoskeleton.* 40:13–21.
74. Straight, A. F., A. Cheung, ..., T. J. Mitchison. 2003. Dissecting temporal and spatial control of cytokinesis with a myosin II inhibitor. *Science.* 299:1743–1747.
75. Zhou, J., H. Y. Kim, ..., L. A. Davidson. 2010. Macroscopic stiffening of embryonic tissues via microtubules, RhoGEF and the assembly of contractile bundles of actomyosin. *Development.* 137:2785–2794.
76. Campbell, R. A., K. A. Overmyer, ..., A. S. Wolberg. 2009. Contributions of extravascular and intravascular cells to fibrin network formation, structure, and stability. *Blood.* 114:4886–4896.
77. MacKintosh, F. C., and A. J. Levine. 2008. Nonequilibrium mechanics and dynamics of motor-activated gels. *Phys. Rev. Lett.* 100:018104–018107.
78. Broedersz, C., and F. MacKintosh. 2011. Molecular motors stiffen non-affine semiflexible polymer networks. arXiv:1009.3848.
79. Chen, P., and V. Shenoy. 2011. Strain stiffening induced by molecular motors in active crosslinked biopolymer networks. *Soft Matter.* 7:355–358.
80. Lam, W. A., O. Chaudhuri, ..., D. A. Fletcher. 2011. Mechanics and contraction dynamics of single platelets and implications for clot stiffening. *Nat. Mater.* 10:61–66.
81. Lee, K., H. Kong, ..., D. Mooney. 2003. Hydrogel formation via cell crosslinking. *Adv. Mater.* 15:1828–1832.
82. Wang, N., I. M. Tolić-Nurelykke, ..., D. Stamenović. 2002. Cell prestress. I. Stiffness and prestress are closely associated in adherent contractile cells. *Am. J. Physiol. Cell Physiol.* 282:C606–C616.
83. Bloom, R. J., J. P. George, ..., D. Wirtz. 2008. Mapping local matrix remodeling induced by a migrating tumor cell using three-dimensional multiple-particle tracking. *Biophys. J.* 95:4077–4088.
84. Petroll, W. M., L. Ma, ..., M. Vishwanath. 2008. Analysis of the pattern of subcellular force generation by corneal fibroblasts after Rho activation. *Eye Contact Lens.* 34:65–70.
85. Koch, T. M., S. Münster, ..., B. Fabry. 2012. 3D Traction forces in cancer cell invasion. *PLoS ONE.* 7:e33476.
86. Onck, P. R., T. Koeman, ..., E. van der Giessen. 2005. Alternative explanation of stiffening in cross-linked semiflexible networks. *Phys. Rev. Lett.* 95:178102.



87. Houser, J. R., N. E. Hudson, ..., M. R. Falvo. 2010. Evidence that  $\alpha$ C region is origin of low modulus, high extensibility, and strain stiffening in fibrin fibers. *Biophys. J.* 99:3038–3047.
88. Brown, A. E., R. I. Litvinov, ..., J. W. Weisel. 2007. Forced unfolding of coiled-coils in fibrinogen by single-molecule AFM. *Biophys. J.* 92:L39–L41.
89. Zhmurov, A., A. E. Brown, ..., V. Barsegov. 2011. Mechanism of fibrin(ogen) forced unfolding. *Structure.* 19:1615–1624.
90. Zhmurov, A., O. Kononova, ..., J. W. Weisel. 2012. Mechanical transition from  $\alpha$ -helical coiled coils to  $\beta$ -sheets in fibrin(ogen). *J. Am. Chem. Soc.* 134:20396–20402.
91. Koenderink, G. H., M. Atakhorrami, ..., C. F. Schmidt. 2006. High-frequency stress relaxation in semiflexible polymer solutions and networks. *Phys. Rev. Lett.* 96:138307.
92. Beningo, K. A., and Y. L. Wang. 2002. Flexible substrata for the detection of cellular traction forces. *Trends Cell Biol.* 12:79–84.
93. Rudnicki, M. S., H. A. Cirka, ..., K. L. Billiar. 2013. Nonlinear strain stiffening is not sufficient to explain how far cells can feel on fibrous protein gels. *Biophys. J.* 105:11–20.
94. Ma, X., M. E. Schickel, ..., R. T. Hart. 2013. Fibers in the extracellular matrix enable long-range stress transmission between cells. *Biophys. J.* 104:1410–1418.
95. Shokef, Y., and S. A. Safran. 2012. Scaling laws for the response of nonlinear elastic media with implications for cell mechanics. *Phys. Rev. Lett.* 108:178103.
96. Reinhart-King, C. A., M. Dembo, and D. A. Hammer. 2008. Cell-cell mechanical communication through compliant substrates. *Biophys. J.* 95:6044–6051.
97. Schwarz, U. S., and S. A. Safran. 2002. Elastic interactions of cells. *Phys. Rev. Lett.* 88:048102.
98. Bischofs, I. B., and U. S. Schwarz. 2005. Effect of poisson ratio on cellular structure formation. *Phys. Rev. Lett.* 95:068102.
99. Zemel, A., I. B. Bischofs, and S. A. Safran. 2006. Active elasticity of gels with contractile cells. *Phys. Rev. Lett.* 97:128103.
100. Zemel, A., and S. A. Safran. 2007. Active self-polarization of contractile cells in asymmetrically shaped domains. *Phys. Rev. E Stat. Nonlin. Soft Matter Phys.* 76:021905.
101. Huebsch, N., P. R. Arany, ..., D. J. Mooney. 2010. Harnessing traction-mediated manipulation of the cell/matrix interface to control stem-cell fate. *Nat. Mater.* 9:518–526.
102. Shaikh, F. M., A. Callanan, ..., T. M. McGloughlin. 2008. Fibrin: a natural biodegradable scaffold in vascular tissue engineering. *Cells Tissues Organs (Print)*. 188:333–346.
103. Kamphuis, W., C. Mamber, ..., E. M. Hol. 2012. GFAP isoforms in adult mouse brain with a focus on neurogenic astrocytes and reactive astrogliosis in mouse models of Alzheimer disease. *PLoS ONE.* 7:e42823.
104. Dijk, F., E. Kraal-Muller, and W. Kamphuis. 2004. Ischemia-induced changes of AMPA-type glutamate receptor subunit expression pattern in the rat retina: a real-time quantitative PCR study. *Invest. Ophthalmol. Vis. Sci.* 45:330–341.
105. Ye, J., G. Coulouris, ..., T. L. Madden. 2012. Primer-BLAST: a tool to design target-specific primers for polymerase chain reaction. *BMC Bioinformatics.* 13:134–145.
106. Noguera, J., A. Lecuona, and P. Rodríguez. 2005. Limits on the resolution of correlation PIV iterative methods. *Fundamentals. Exp. Fluids.* 39:305–313.
107. Rezakhanliha, R., A. Agianniotis, ..., N. Stergiopoulos. 2012. Experimental investigation of collagen waviness and orientation in the arterial adventitia using confocal laser scanning microscopy. *Biomech. Model. Mechanobiol.* 11:461–473.
108. Hess, S., and W. Köhler. 1980. Formeln zur Tensor-Rechnung. Palm & Enke.

## SUPPORTING MATERIAL

### Cells actively stiffen fibrin networks by generating contractile stress

Karin A. Jansen, Rommel G. Bacabac, Izabela K. Piechocka, Gijsje H. Koenderink  
*Biological Soft Matter Group, FOM Institute AMOLF,  
1098 XG Amsterdam, Netherlands*

#### SUPPORTING INFORMATION

##### Materials and Methods

(-)-Blebbistatin (Sigma-Aldrich) was dissolved in methanol to a final concentration of 5 mM and stored at -20°C. The drug was tested in a final concentration range of 2 to 100 μM. Controls in which we added methanol without blebbistatin in cell culture medium showed no effect on cell morphology at these concentrations. In contrast, there was a clear reduction of cell spreading with increasing blebbistatin concentration (data not shown).

To test the involvement of integrins in cell spreading and traction force generation, we added the integrin-binding peptide GRGDS (AnaSpec Inc., Seraing, Belgium) to a 3 mg/ml fibrin matrix with fibroblasts, once the cells were well-spread. This peptide should compete with integrin binding sites on fibrin (1-3). GRGDS was dissolved in 5% acetic acid at a concentration of 2 mM and stored at -20°C. GRGDS was freshly diluted with CO<sub>2</sub>-independent medium to a concentration of 20 μM and added to cell-populated gels after completion of cell spreading by exchanging this medium with the medium on top of the glass disc. The final GRGDS concentration was 10 μM, sufficient for maximal inhibition of integrin binding (1-3).

##### qPCR protocol

Cells were allowed to spread for 6 hours within gels of 1 mg/ml fibrin (denoted as “3D”) at a cell density of 500#/μl. Medium was removed and replaced by 0.05% trypsin/EDTA (Invitrogen). The gels were incubated for ~10 min at 37°C to dissolve the gels. The solutions were then spun down and the pellets were quick-frozen and stored at -80°C. Cells cultured in tissue culture flasks (denoted as “2D”) were trypsinized and collected by centrifugation. Cell pellets were quick-frozen and stored at -80°C. Quantitative real time PCR (qPCR) analysis was performed as described elsewhere(4). Briefly, RNA was isolated from cells grown in 2D or 3D culture using TRIsure (Bioline) and precipitated in 2-propanol for 1 hour room temperature. 500 ng of RNA was DNaseI treated and used as a template to generate cDNA following the manufacturer’s instructions (Quantitect-Qiagen, Venlo, the Netherlands) with a mixture of oligo dT and random primers at 42°C during 30 min. The resulting cDNA (10 μl) was diluted 1:20 and served as a template in real-time quantitative PCR assays (SYBR Green PCR Master Mix (ABI)). Quantification and normalization procedures are described in detail elsewhere (5). Briefly, the expression of the genes *rnapolii*, *hpri*, *gapdh* and *ef1a* were used to normalize the detected integrin expression. Primers were designed for the PCR product to be intron spanning using NCBI’s Primer Blast (6). qPCR was performed for integrin β3 with primers FW: CCCCACCACAGGCAATCAAA, and RV: AGCGTCAGCACGTGTTTGTA, and for integrin αV with primers FW: CAAGGGAACCCTTCCTCGGA, and RV: GGAGAAACAGTGCTCGTCGG.

## Rheology

For rheology measurements of (cell seeded) fibrin gels, a steel cone and plate (40-mm diameter, 1°) was used. After 10 minutes, the fibrin gel was overlaid with 8 mL of  $\alpha$ MEM supplemented with 2% FBS, 20 mM HEPES, and 0.1% antibiotics, as sketched in Fig. 1A. Since the medium is only touching the edges of the geometry, there will be a gradient of nutrients and oxygen from the sample edge to the center. To assess whether this gradient influences cell viability, we imaged cells within fibrin networks in a custom-made glass sample chamber that mimics the cone-plate geometry of the rheometer. Based on cell morphology, we counted the number of spread, round and dead cells (Fig. S1). We found that up to about 10 mm inwards (corresponding to half the radius of the geometry), the cells are spread. At 8-9 mm inwards, the fraction of round cells starts to go up. At about 12 mm inwards, cells start to die, mostly likely due to an oxygen and metabolite gradient. Thus, clearly, cells do not behave the same in the center as near the edge. It should be noted, however, that in a cone-plate geometry, the outer edges contribute much more strongly to the measured mechanics than the center of the sample. Also in the region where the cells do spread, more than 80% of the sample volume is located. We also note that even if the CP40-1 geometry is not ideal for cell survival, it does create a three-dimensional scaffold for the cells and is therefore a reasonable compromise between cell survival and three-dimensionality, with the effect of dead cells on fibrin gel mechanics being minimal. We also checked that the presence of medium around the rheometer plates did not influence the viscoelastic behavior.

## PIV analysis

Particle Image Velocimetry (PIV) analysis was performed based on fluorescence confocal microscopy time-lapse movies of 2 and 3 mg/ml fibrin gels recorded during cell spreading. We used an existing PIV routine in Matlab (PIVlab\_GUI.m, downloaded from <http://www.mathworks.nl>). Briefly, 1064x1064 pixels images were highpass filtered using a filter size of 15 to 30 pixels before analysis. PIVlab uses a method called ‘multiple pass’ to increase accuracy. The search window area at step one was 64 pixels with 32 pixel overlap, at step two 32 with 18 pixels overlap and at step three 20 with 10 pixels overlap. The last step is chosen to be slightly bigger than the observed meshsize. For finding of the peak of the correlation matrix, a Gaussian 2x3 point sub-pixel estimator was used. The final accuracy was estimated to be 1 to 2  $\mu$ m, corresponding to a few pixels (7).

## Alignment analysis

To analyze the response of fibrin fiber orientations to the presence of cells, we analyzed confocal images of cell-free and cell-populated fibrin networks using the ImageJ plugin OrientationJ, developed by Daniel Sage at the Biomedical Image Group (BIG), EPFL, Switzerland and freely available at [bigwww.epfl.ch](http://bigwww.epfl.ch) (*last visited 26 August 2013*). Specifically, we analyzed maximum intensity projections of z-scans taken over a depth of 40  $\mu$ m (1  $\mu$ m step size). Briefly, OrientationJ evaluates the local orientation and coherency of every image pixel and computes a distribution of angles. A Gaussian window of 2 or 3 pixels and a Gaussian gradient was used to determine the local derivative (8). Using these orientation images, we calculated the nematic order parameter. Given a collection of orientation measurements,  $\theta$ , in the range  $(-90^\circ, 90^\circ]$ , the nematic order parameter is computed from the second-order tensor order-parameter  $S_2$ (9):



$$S_2 = \begin{bmatrix} \langle \cos 2\theta \rangle & \langle \sin 2\theta \rangle \\ \langle \sin 2\theta \rangle & -\langle \cos 2\theta \rangle \end{bmatrix}$$

Angle brackets  $\langle \cdot \rangle$  denote averages over all orientation measurements. The tensor  $S_2$  is symmetric and traceless. Solving the eigenvalue problem for  $S_2$  yields two eigenvalues,

$$\lambda_{1,2} = \pm \sqrt{\langle \cos 2\theta \rangle^2 + \langle \sin 2\theta \rangle^2} = \pm S$$

which yield the (two-dimensional) scalar order-parameter  $S$  familiar for liquid crystals. This order parameter quantifies the width of the distribution of orientation measurements. It is zero for a uniform distribution of orientations, and approaches one for a sharply-peaked distribution. We find that in practice  $S$  is between 0.1 and 0.2 for isotropic networks.

## SUPPORTING REFERENCES

1. Tuan, T., and F. Grinnell. 1989. Fibronectin and fibrinolysis are not required for fibrin gel contraction by human skin fibroblasts. *J. Cell Physiol.* 140:577-583.
2. Gailit, J., C. Clarke, D. Newman, M. Tonnesen, M. Mosesson, and R. Clark. 1997. Human fibroblasts bind directly to fibrinogen at RGD sites through integrin  $\alpha V\beta 3$ . *Exp. Cell Res.* 232:118-126.
3. Campbell, R., K. Overmyer, C. Selzman, B. Sheridan, and A. Wolberg. 2009. Contributions of extravascular and intravascular cells to fibrin network formation, structure, and stability. *Blood* 114:4886-4896.
4. Kamphuis, W., C. Mamber, M. Moeton, L. Kooijman, J. Sluijs, A. Jansen, M. Verveer, L. deGroot, V. Smith, S. Rangarajan, J. Rodríguez, M. Orre, and E. Hol. 2012. GFAP isoforms in adult mouse brain with a focus on neurogenic astrocytes and reactive astrogliosis in mouse models of Alzheimer disease. *PLoS One* 7:e42823.
5. Dijk, F., E. Kraal-Muller, and W. Kamphuis. 2004. Ischemia-induced changes of AMPA-type glutamate receptor subunit expression pattern in the rat retina: a real-time quantitative PCR study. *Invest. Ophthalmol. Vis. Sci.* 45:330-341.
6. Ye, J., G. Coulouris, I. Zaretskaya, I. Cutcutache, S. Rozen, and T. Madden. 2012. Primer-BLAST: a tool to design target-specific primers for polymerase chain reaction. *BMC Bioinformatics* 13:134.
7. Noguera, J., A. Lecuona, and P. Rodríguez. 2005. Limits on the resolution of correlation PIV iterative methods. *Fundamentals. Experiments in Fluids* 39:9.
8. Rezakhaniha, R., A. Aghianniotis, J. Schrauwen, A. Griffa, D. Sage, C. Bouten, F. vandeVosse, M. Unser, and N. Stergiopoulos. 2011. Experimental investigation of collagen waviness and orientation in the arterial adventitia using confocal laser scanning microscopy. *Biomech. Model Mechanobiol.* 11:461-473.
9. Hess, S., and W. Köhler. 1980. Formeln zur Tensor-Rechnung. Palm & Enke.

## SUPPORTING FIGURES

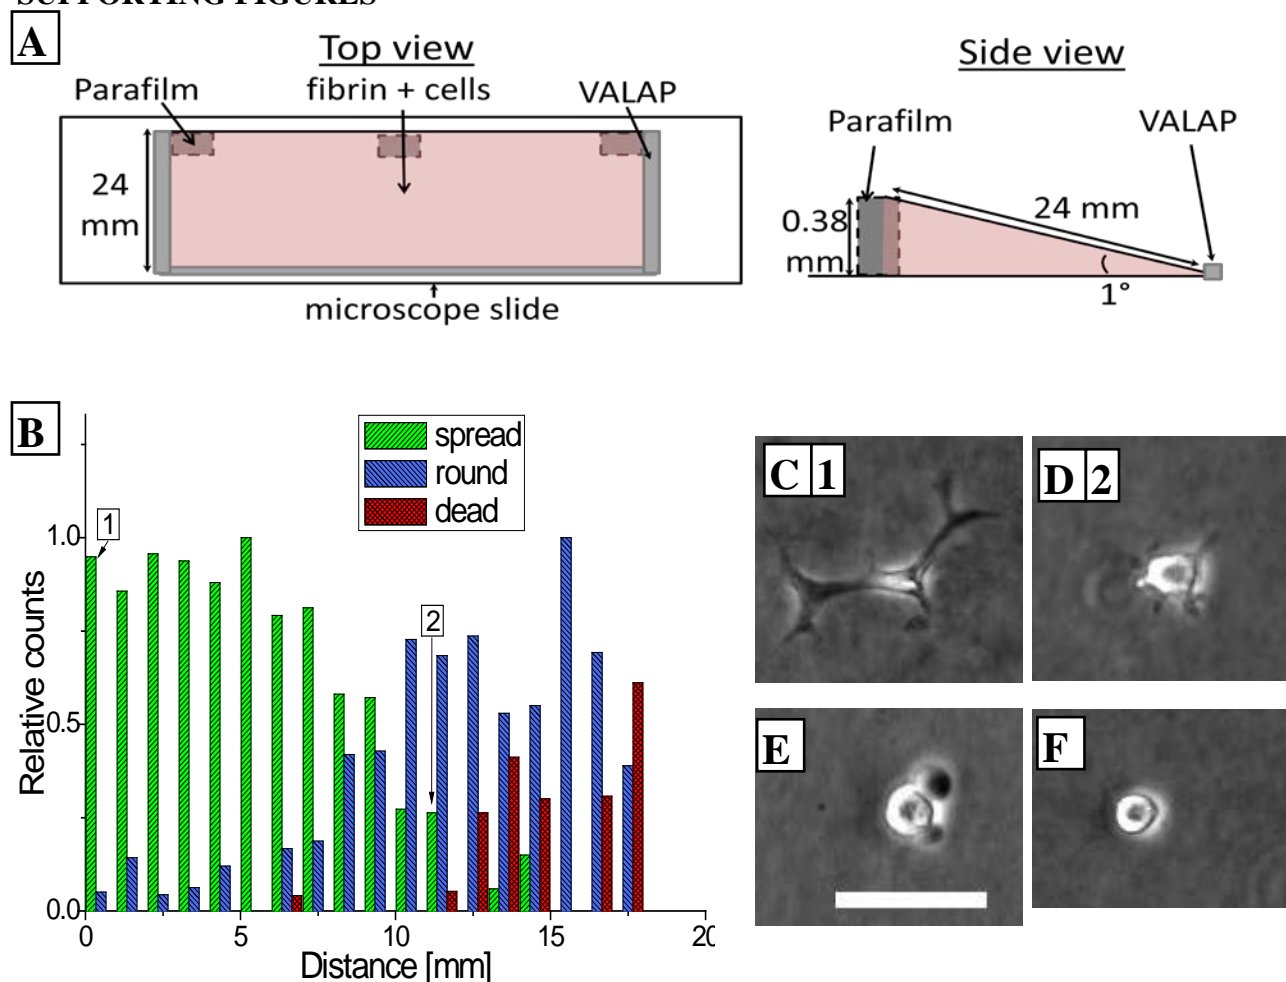

**FIGURE S1 (color online) Morphologies of cells in a 2 mg/ml fibrin gels after 7 hours in a sample geometry that mimics the rheometer cone-plate geometry.** A) Schematic showing how the CP40-1 geometry is mimicked using glass coverslips (not drawn to scale). After filling the geometry with a solution of activated fibrinogen and cells, the sides were sealed with VALAP and the geometry was placed in a petridish with medium after 10 minutes polymerization. Cells were observed in the middle of the glass slide. B) Relative counts of spread (*green*), round (*blue*) and dead cells (*red*) as a function of distance from the edge, as determined from cell morphology. C-F) Examples of cell morphologies observed with a 10x air objective using phase contrast. C) and D) represent ‘spread’ morphologies seen at spot 1 and 2 in B). E) Example of a dead cell. F) Example of a round cell. The scale bar is 50  $\mu\text{m}$  for all images.

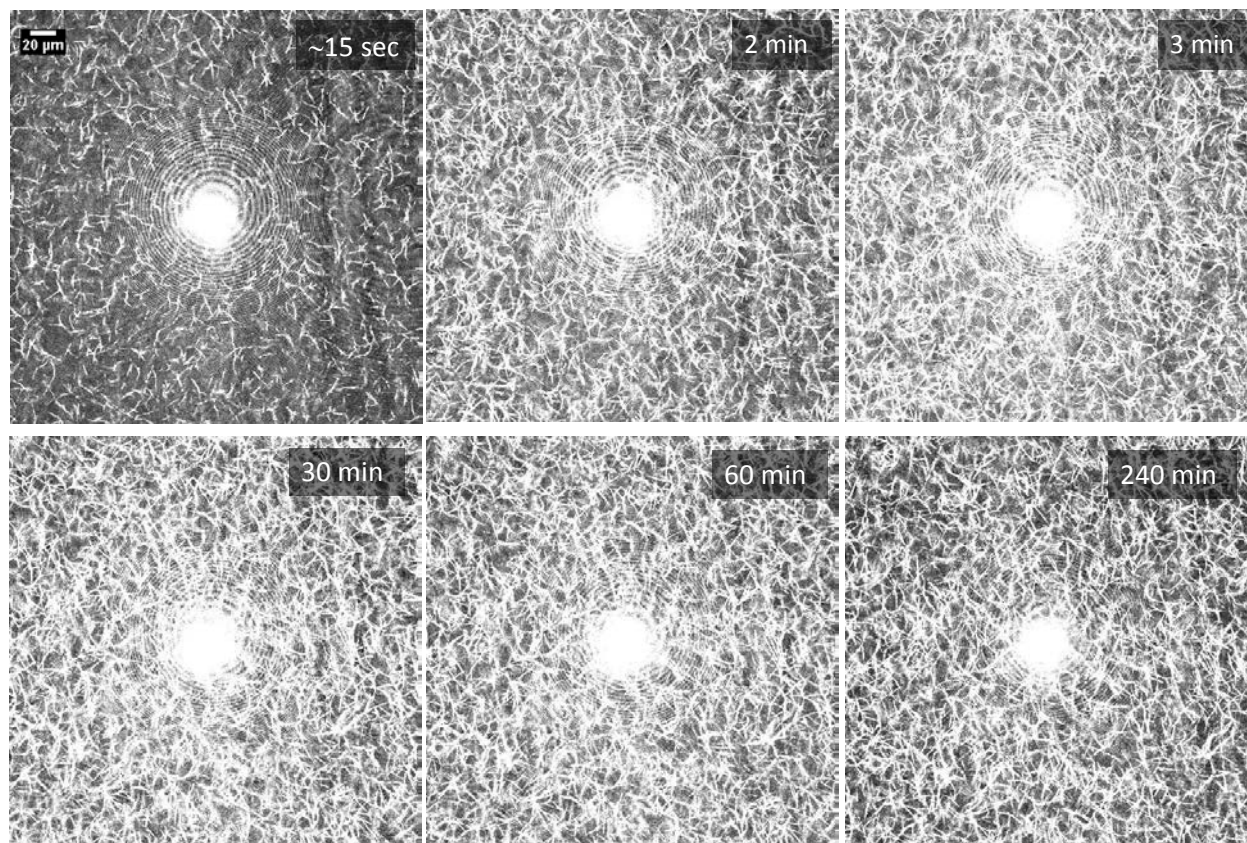

**FIGURE S2. Time lapse images showing polymerization of a cell-free fibrin gel recorded by label-free confocal reflection microscopy (1 mg/ml).** The scale bar denotes 20  $\mu\text{m}$ . Images were taken using a 40x oil objective and 457 nm laser light. Time elapsed since the addition of thrombin is indicated in each panel. The bright spot in the center is an artifact of the imaging technique. Images recorded after the 15 second time point are over-saturated because the laser and detector settings were optimized to capture the earliest time point.



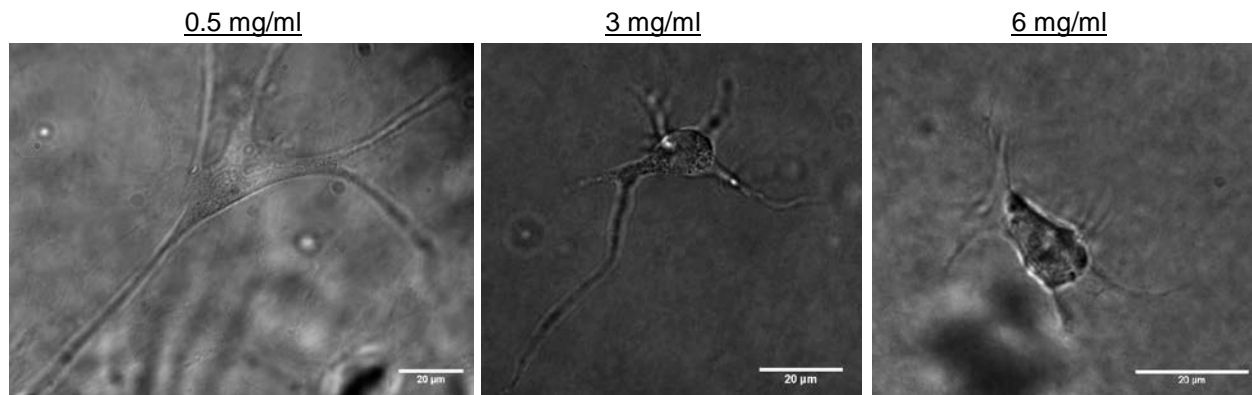

**FIGURE S3. Cells in fibrin gels of different concentrations (see labels) imaged using a 40x oil immersion objective.** Images were taken after overnight incubation. The scale bars are 20  $\mu\text{m}$ .

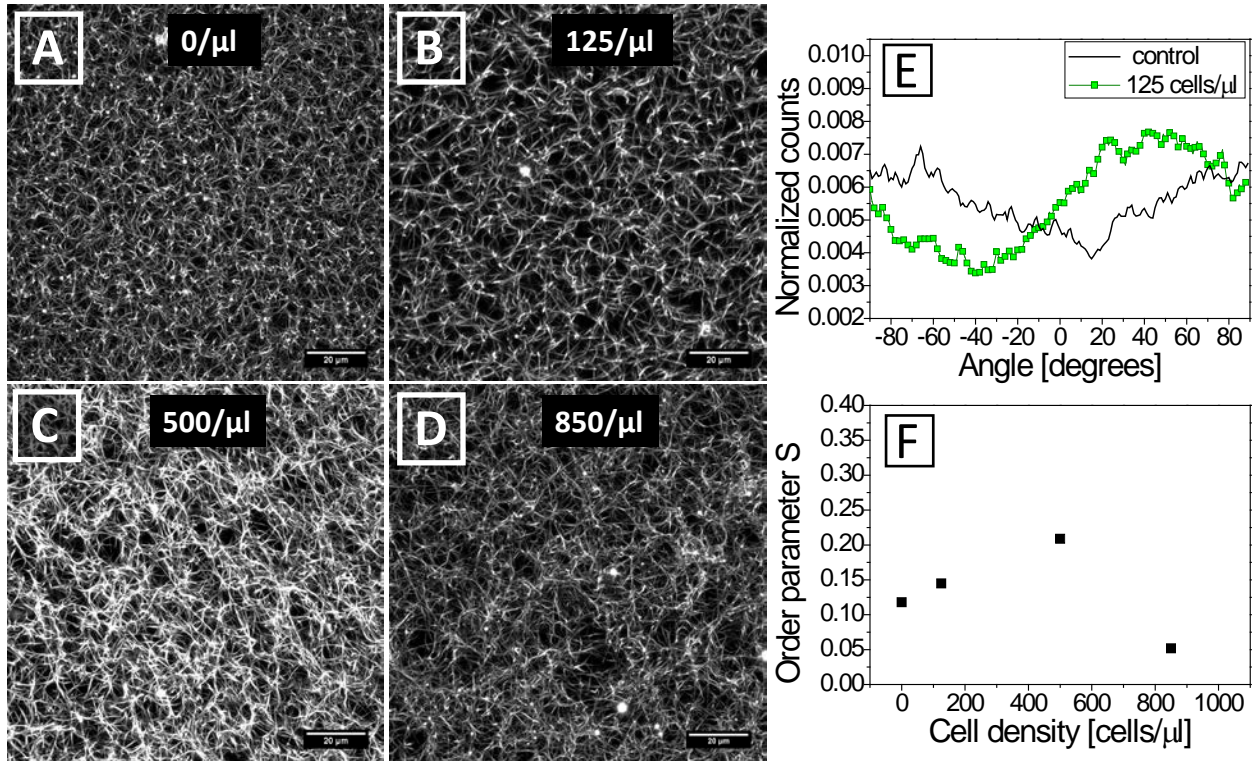

**FIGURE S4. The effect of increasing cell density (see labels) on fibrin network structure.** (A)-(D) All images are maximum intensity projections of confocal fluorescence microscopy stacks of 40 images spanning 40 μm in height. The cell density was varied from 0 to 850 cells/μl (see labels). Scale bars are 20 μm. (E) Pixel orientation histogram for images (A) (control, *black line*) and (B) (*green line squares*). Images were analyzed using OrientationJ. (F) Nematic order parameter of images (A-D). S can range between 0 for an isotropic system and 1 for a perfectly aligned system, but in practice we find values of 0.1-0.2 for isotropic networks. Only the networks with 500 cells/μl is slightly anisotropic (S = 0.21).

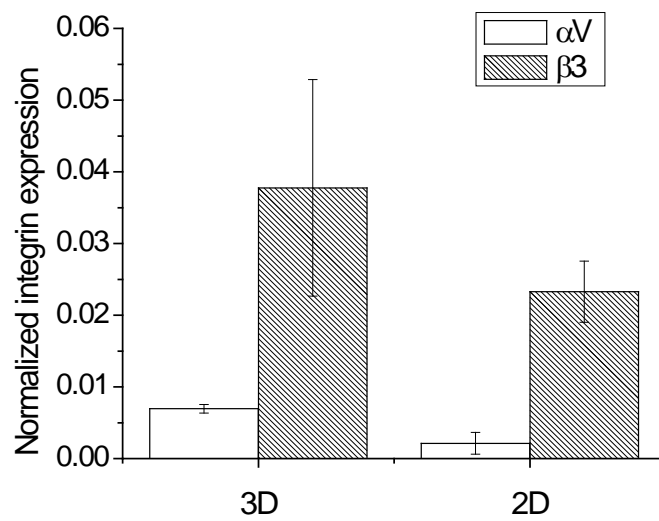

**FIGURE S5.** Normalized expression of integrins  $\alpha V$  and  $\beta 3$  (see legend) for CCL224 fibroblasts cultured inside a fibrin gel (3D) or in flasks (2D). The measurements were performed using qPCR.

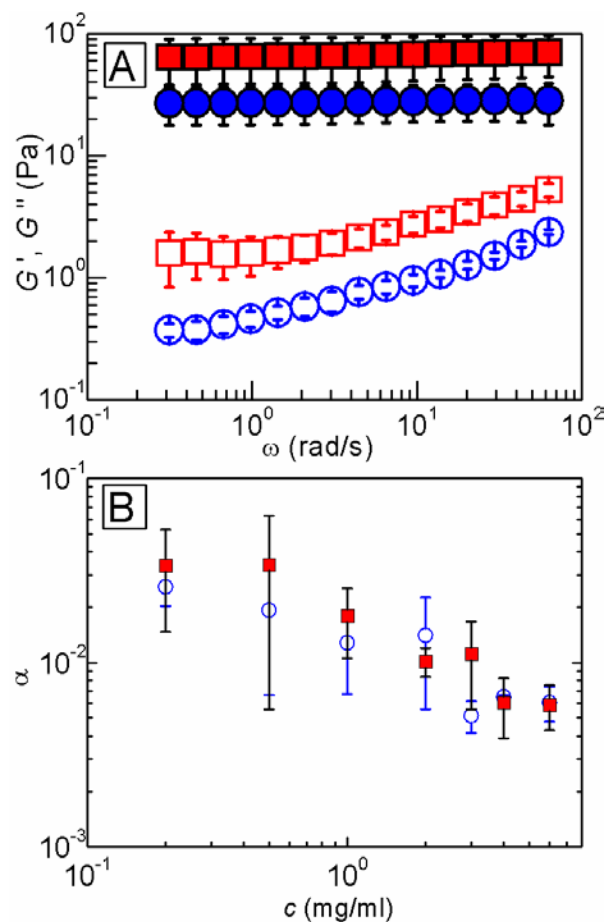

**FIGURE S6. (color online) Frequency dependence of the linear rheology of fibrin gels with cells (red squares) and without cells (blue circles).** (A) Linear elastic modulus (solid symbols) and viscous modulus (open symbols) of a fibrin network (1 mg/ml) with and without cells (500  $\mu$ l). (B) Power law exponent,  $\alpha$ , of the frequency dependent elastic modulus for fibrin networks with and without cells (500  $\mu$ l) as a function of fibrin concentration.



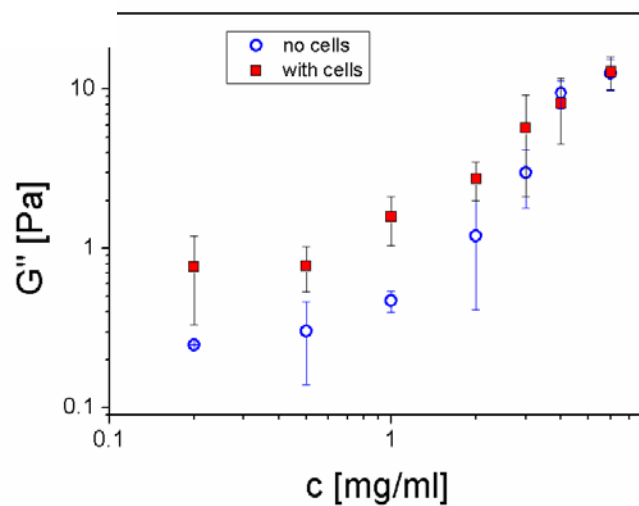

**FIGURE S7. (color online)** The viscous (loss) modulus  $G''$  of cell-seeded (500/ $\mu$ l) fibrin gels (red solid squares) and unseeded fibrin gels (blue open circles) as a function of fibrin concentration.

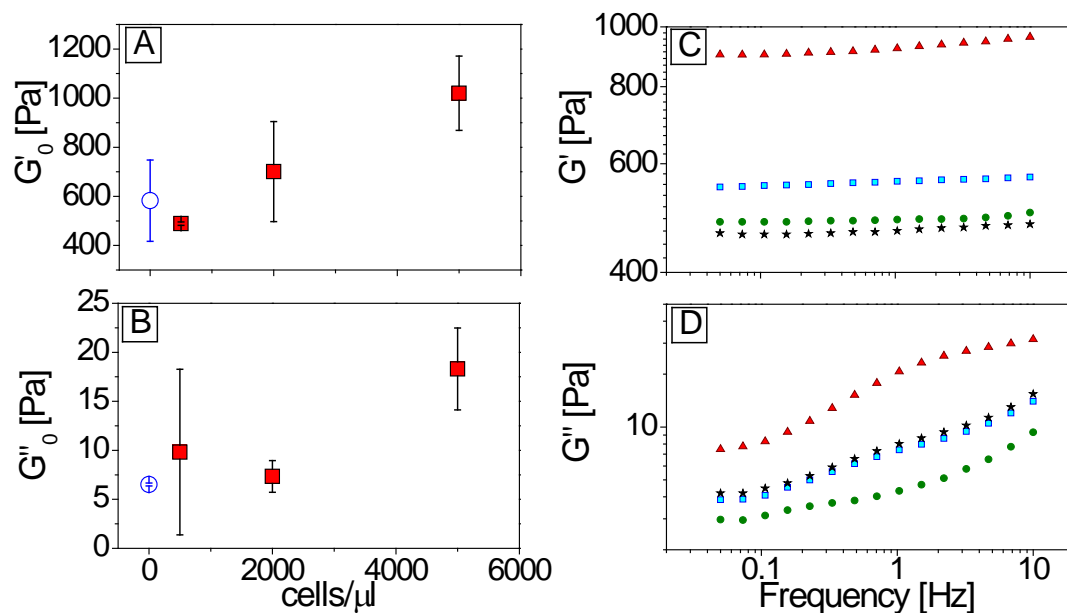

**FIGURE S8** (*color online*) (A-B) The elastic (storage) plateau modulus,  $G'_0$ , and viscous (loss) modulus  $G''_0$  of cell-seeded fibrin gels (red solid squares) and unseeded fibrin gels (blue open circles) as a function of cell density for a 4 mg/ml fibrin gel. (C-D) The frequency dependence of cell-seeded fibrin gels (green filled circles 500 cells/ $\mu\text{l}$ , blue squares 2000 cells/ $\mu\text{l}$ , red triangles 5000 cells/ $\mu\text{l}$ ) and unseeded fibrin gels (black stars) as a function of cell density for a 4 mg/ml fibrin gel. The frequency dependence is unaffected, except at 5000 cells/ $\mu\text{l}$ . Perhaps the volume fraction of cells is large enough here to influence the overall rheology.

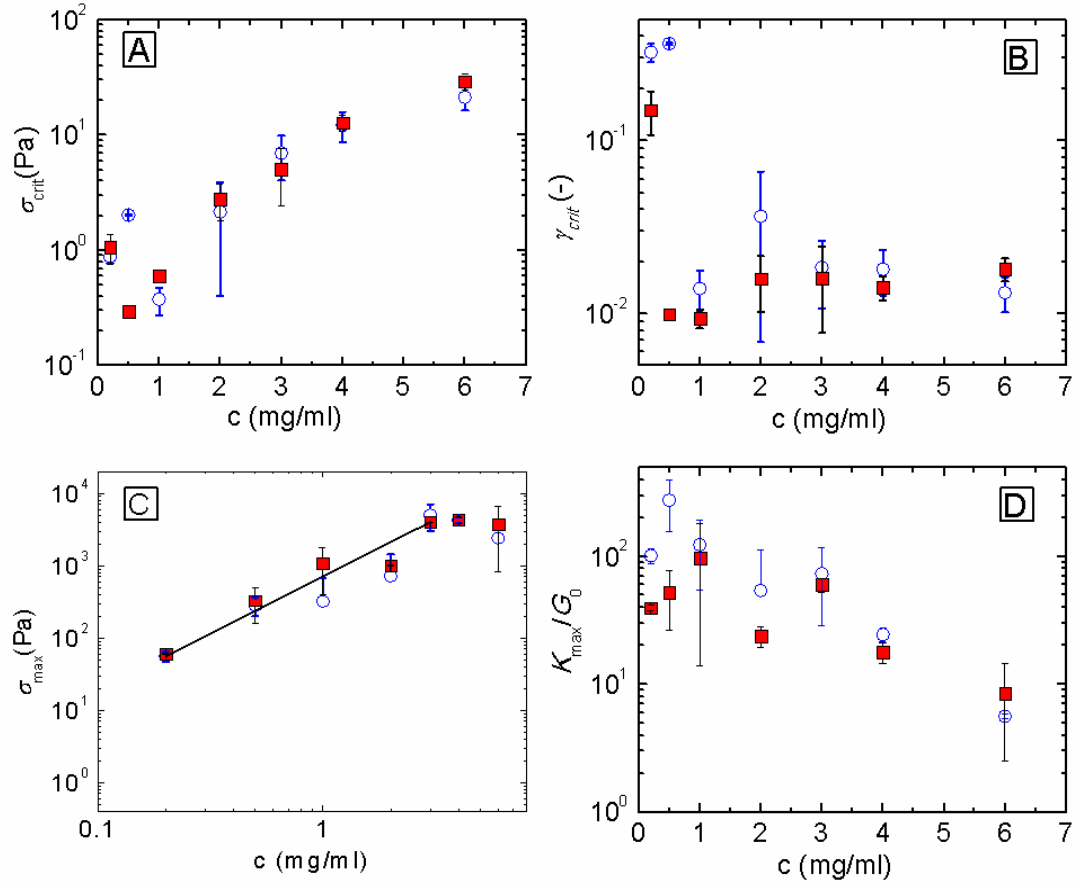

**FIGURE S9 (color online)** Critical stress (A) and critical strain (B), maximum shear stress (C) and the maximum extend of strain-stiffening before breakage ( $K_{max}/G_0$ , (D)), plotted against fibrin concentration. Open circles correspond to unseeded gels, while closed squares correspond to gels with 500 cells/ $\mu$ l. The line in (C) shows a power-law fit with an exponent of  $1.6 \pm 0.14$ .

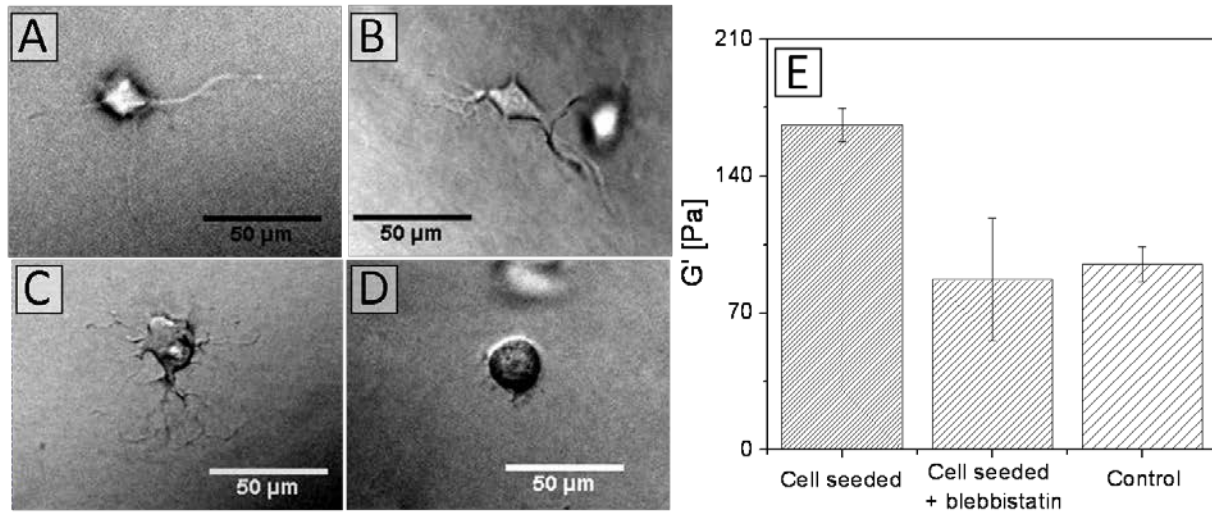

**FIGURE S10. Effect of blebbistatin on cell spreading and fibrin gel mechanics.** (A)-(D) Typical cell morphologies of cells in 2 mg/ml fibrin gels after 7 hours of spreading in the absence (A) or in the presence of blebbistatin (2, 40 and 100 μM in panels (B), (C), (D), respectively). Images were taken in bright field using a 10x air objective. Scale bar is 50 μm for all images. (E) Fibrin gel stiffness with and without cells in the presence or absence of blebbistatin. Blebbistatin was added in the medium from the start to a final concentration of 100 μM. In case of the control sample (no cells), we added methanol without blebbistatin. For the cell seeded case there was no methanol added to the medium. However, tests in 2D culture showed no effect on cell spreading at this methanol concentration. Data points are averages of 4 separate measurements for the control and of two separate measurements for the other two cases.



## MOVIE CAPTIONS

**Movie S1** Time-lapse movie of a fibroblast spreading inside a network of 0.5 mg/ml fibrin. The movie starts 10 min after starting fibrin polymerization and the total duration is 9 hours. The frame rate is 1 frame/min. Images were taken using a bright field microscope with a 10×/0.3 N.A. air objective.

**Movie S2** Time-lapse movie of a fibroblast spreading inside a network of 6 mg/ml fibrin. The movie starts 10 min after starting fibrin polymerization and the total duration is 9 hours. The frame rate is 1 frame/min. Images were taken using a bright field microscope with a 10×/0.3 N.A. air objective.

**Movie S3** 3D-Reconstruction of a confocal fluorescence microscopy z-stack consisting of 93 slices spaced 300 nm apart of a 1 mg/ml fibrin gel with an embedded fibroblast, 4 hours after polymerization. Images were taken using a confocal microscope with a 100× oil immersion objective.

**Movie S4** Time-lapse movie of a fibroblast spreading inside a 1 mg/ml fibrin network seeded with fiducial markers (1 μm diameter polystyrene beads) that reveal the influence of cell contraction on the surrounding fibrin network. The total duration is 4 hours, and the frame rate is 1 frame/min. As the cell spreads, it pulls the beads inward, starting about 1 hour after fibrin polymerization.

**Movie S5** Time-lapse movie showing that addition of the RGD peptide GRGDS causes an abrupt release of tension in the fibrin matrix surrounding a fully spread fibroblast; the cell rounds up and the fiducial markers (5 μm diameter polystyrene beads) near the cell are displaced. The fibrin concentration is 3 mg/ml. The total duration is 9 hours, and the frame rate is 1 frame/min. Images were taken using a bright field microscope with a 10×/0.3 NA air objective and extra magnification of 1.5x.

**Movie S6** Time-lapse movie of fibroblasts spreading inside a 2 mg/ml fibrin gel. Cells are imaged by DIC (*top left*), while the fibrin network is imaged by confocal fluorescence microscopy (*top right*). The deformation of the fibrin network during cell spreading is evident from the PIV analysis shown in the bottom left corner. The total duration is 7.5 hours, the frame rate is 1 frame/10 min. Images were taken with an inverted Nikon confocal microscope with a 40x oil immersion objective and a 488 nm laser. The scale bar denotes 100 μm for all movies.

**Movie S7** Time-lapse movie of fibroblasts spreading inside a 3 mg/ml fibrin gel. Cells are imaged by DIC (*top left*), while the fibrin network is imaged by confocal fluorescence microscopy (*top right*). There is no evident network deformation at timescales up to 7.5 hour, as shown with PIV analysis (*bottom left corner*). The total duration is about 9 hours, the frame rate is 1 frame/10 min. Images were taken with an inverted Nikon confocal microscope with a 40x oil immersion objective and a 488 nm laser. The scale bar denotes 100 μm for all movies. The color scale for the PIV analysis indicates the velocity in pixels/10min.
